## MINIREVIEW

# Yeast-based vaccines: New perspective in vaccine development and application

Ravinder Kumar<sup>1,\*,\dagger,\ddagger</sup> and Piyush Kumar<sup>2</sup>

<sup>1</sup>Section of Molecular Biology, Division of Biological Sciences, University of California San Diego, 9500 Gilman Drive, La Jolla, CA 92093, USA and <sup>2</sup>Department of Biosciences and Bioengineering, Indian Institute of Technology Bombay, Powai, Mumbai 400 076, Maharashtra, India

\*Corresponding author: Genentech Hall N416, University of California San Francisco, 600 16th Street, San Francisco, California 94158, USA. E-mail: [raj86tau@gmail.com](mailto:raj86tau@gmail.com)

<sup>†</sup>Present address: Department of Obstetrics, Gynecology and Reproductive Sciences, University of California San Francisco, San Francisco, CA 94158, USA

One sentence summary: Yeast in vaccine development.

Editor: Hyun Ah Kang

<sup>‡</sup>Ravinder Kumar, <http://orcid.org/0000-0003-1922-0030>

## ABSTRACT

In presently licensed vaccines, killed or attenuated organisms act as a source of immunogens except for peptide-based vaccines. These conventional vaccines required a mass culture of associated or related organisms and long incubation periods. Special requirements during storage and transportation further adds to the cost of vaccine preparations. Availability of complete genome sequence, well-established genetic, inherent natural adjuvant and non-pathogenic nature of yeast species viz. *Saccharomyces cerevisiae*, *Pichia pastoris* makes them an ideal model system for the development of vaccines both for public health and for on-farm consumption. In this review, we compile the work in this emerging field during last two decades with major emphases on *S. cerevisiae* and *P. pastoris* which are routinely used worldwide for expression of heterologous proteins with therapeutic value against infectious diseases along with possible use in cancer therapy. We also pointed towards the developments in use of whole recombinant yeast, yeast surface display and virus-like particles as a novel strategy in the fight against infectious diseases and cancer along with other aspects including suitability of yeast in vaccines preparations, yeast cell wall component as an immune stimulator or modulator and present status of yeast-based vaccines in clinical trials.

**Keywords:** vaccine(s); yeast; yeast display; whole recombinant yeast; virus-like particles

## INTRODUCTION

Despite the dramatic improvement in medical facilities, public health services and hygiene, infectious diseases remain a most important cause of human and farm animal sufferings across the globe and millions of people suffer and die every year from preventable infectious diseases. The emergence of antibiotic-resistant strains in pathogenic microbial population

puts another hurdle in preventing human and animal suffering. Political instability and desire for high capital gain make the available vaccine out of reach those need them badly. Lack of necessary infrastructure for the proper supply and storage further increase the cost of conventional vaccines especially in developing countries of Asia and Africa.

Discovery of antibiotics in the early 1940s and their widespread application from 1960s onward have dramatically reduced the deaths and sufferings from microbial infections.

Received: 9 October 2018; Accepted: 18 January 2019

Published by Oxford University Press on behalf of FEMS 2019. This work is written by (a) US Government employee(s) and is in the public domain in the US.

Even then, infectious diseases are still the major threat to public health and farm animals, particularly in third-world countries. Blind applications of antibiotics in research, agriculture and public health led to the emergence of pathogenic strains that are no longer responsive towards available antibiotics (Davies 1994). In such scenarios, vaccine(s) (immunogen preparations that are deliberately injected into an individual for protection from infectious disease in future) remains the most important and safer way of combating infectious diseases. Therefore, there is an urgent need to look for new ways of vaccine generation that can cut down the cost, time and the need for special requirements during storage and distribution. In most of the conventional vaccine(s), dead/killed or attenuated/weakened organism(s) acts as a source of immunogens (Shams 2005). The arrival of DNA recombinant technology in the 1980s and parallel improvement in protein chemistry allows expression and purification of protein(s) in unlimited quantity, thus opening the door for peptide(s) or protein(s) vaccines as a prophylactic measure against infectious diseases, example peptide-based vaccine against Hepatitis B (Perrie et al. 2008).

## CONCERNS RELATED TO CONVENTIONAL VACCINES

Although presently available vaccines proved to be highly valuable in the fight against infectious diseases and eradication of smallpox and soon polio is possible due to conventional vaccines. Despite these success stories, present vaccine preparation or application regime suffers from many drawbacks. For example, conventional vaccines require adjuvants and multiple injections for the induction of necessary or optimum immune response. Apart from that, these vaccine preparations pose another risk of pathogenicity with live attenuated vaccines reverting to virulence (Pastoret 1999; Shams 2005). The problem associated with the mass cultivation of pathogens of important infectious disease like leprosy, malaria defy present regime of vaccine development (Scollard et al. 2006; Cox 1991). The steady rise in the number of allergic or hypersensitivity response after vaccination in a certain group of individuals is another concern associated with conventional vaccines (Narasimhan et al. 2015; Fang et al. 2016). Administration of live or attenuated vaccine in the immunocompromised individuals (whose numbers is rising continuously due to new cases of HIV positive individuals and increase in the number of individuals with organ transplant who are on immunosuppressive drugs) is another point of concern (Rubin et al. 2014). Continuous maintenance of cold chain from manufacturing unit till endpoint user is another important issue associated with conventional vaccines (Das 2004; Chen and Kristensen 2009; Chen et al. 2011). Limitations of conventional vaccines are neatly summarised elsewhere (Pastoret 1999; Narasimhan et al. 2015; Fang et al. 2016; Rubin et al. 2014; Sun et al. 2016).

Thus, looking at the above points, there is an urgent need for novel vaccines with alternative routes of administration, low cost or suitability for resource-poor settings. In such conditions, scientists across the globe are busy in developing new and novel ways of vaccine preparation including DNA-based vaccines; expression of heterologous proteins in bacteria, plants, mammalian and insect's cells. Due to the reasons mentioned in the later section of the review, scientists focused their efforts on yeast as a suitable model system for the expression of heterologous proteins for vaccines development against infectious diseases and cancer.

In the present review, we compile a list of heterologous proteins expressed in different yeast species with the possibility of development of a yeast-based vaccines against infectious diseases along with cancer. We will also discuss novel ways of using yeast against infectious diseases including the use of whole recombinant yeast (WRY), yeast surface display (YSD) or simply yeast display (YD) and virus-like particles (VLPs) and proposed model which showed why whole recombinant yeast and yeast display is superior to the peptide or protein-based vaccines. How yeast cell wall components are important in modulating immune response is also discussed. All these aspects of yeast-based vaccines are described under separate heads.

## SUITABILITY OF YEASTS FOR EXPRESSION OF THERAPEUTIC PROTEINS

Available tools of molecular biology and protein chemistry allow expression of proteins in almost any cells to be it prokaryotes (example *Escherichia coli*, *Bacillus subtilis*) or eukaryotes (example yeast, mammalian cells, cells of insects, in plants and animals). Despite this, yeast or unicellular fungus emerges as a model of choice for routine expression of proteins with medical importance. Some of the salient features that qualify yeast as a choice of model for routine expression of heterologous proteins for clinical or veterinary use are as follows. Unicellular fungus or yeast like *Saccharomyces cerevisiae*, *Schizosaccharomyces pombe*, *Saccharomyces boulardii*, *Hansenula polymorpha*, *Pichia pastoris*, *Candida boldmu*, *Kluyveromyces lactis* and *Yarrowia lipolytica* are known to have highly efficient heterologous gene expression systems (Gellissen et al. 1992a; Gellissen et al. 1992b; Gellissen and Hollenberg 1997; Walker 1998; van Ooyen et al. 2006). Apart from the yeast species mentioned earlier, *Blastobotrys (Arxula) adeninivovrans* also emerges as an important host for expression of heterologous proteins due to various benefits associated with this yeast species including its ability to use a wide range of substrate, availability of genome sequence, responsive to genetic manipulation (Malak, Baronian and Kunze 2016). Comparative advantages and disadvantages of different yeast species as a host for expression of heterologous proteins are discussed elsewhere (Vieira Gomes et al. 2018). Out of hundreds of yeast species, *S. cerevisiae* and *P. pastoris* emerges as a most common host for the expression of heterologous genes and the production of therapeutic proteins (Darby et al. 2012). So far *S. cerevisiae* is the most well-understood eukaryote at the molecular level and is commonly used yeast in brewing and baking for many years. It has been used for several biotechnological purposes due to its cheap and easy cultivation, well-established fermentation processes and large-scale production capabilities (Gellissen and Hollenberg 1997; Walker 1998). Information on its genetics, molecular biology and physiology has been accumulated, ensuring that this organism is a highly available eukaryotic system (Strathern, Jones and Broach 1982; Rose and Harrison 1987; Broach, Pringle and Jones 1991). Several selective promoter elements and mutations in this yeast species was investigated for an increased yield or an improved quality of recombinant products (Gellissen and Hollenberg 1997). Some of the cell components of yeast, act as natural adjuvants with the ability to stimulate or modulating immune response, which is important in using WRY or yeast display for oral application. Due to its simple growing method and non-toxic nature, it is reasonable to believe that such recombinant yeast can be further developed into an edible vaccines. Many heterologous proteins, including the first commercialised recombinant vaccine, the Hepatitis B vaccine, were produced

in *S. cerevisiae*, in which genetic engineering techniques were applied (Valenzuela et al. 1982; Gellissen and Hollenberg 1997). It is also known that living recombinant budding yeast secretes proteins or peptides in mice gut, which opens the way for the development of a live oral vaccine (Blanquet et al. 2004).

Although many heterologous proteins have been successfully expressed in *S. cerevisiae*, its limitations mean that alternative, non-*Saccharomyces* yeasts have to be examined (Gellissen and Hollenberg 1997; Cregg et al. 1987; Gellissen et al. 1992a). Generally, heterologous proteins expressed in *S. cerevisiae* have low yields and are hyperglycosylated, which may result in differences in immunogenicity, diminished activity or decreased serum retention of the foreign protein (Cregg et al. 1987). *Pichia pastoris* is a methylotrophic yeast that uses methanol as its sole energy and carbon source (Gellissen and Hollenberg 1997). The genes encoding key enzymes of the methanol-utilisation pathway, which are generally used by the methylotrophic yeasts, provide inducible promoters for the efficient expression of heterologous DNA sequences (Gellissen and Hollenberg 1997). In addition, *P. pastoris* produces correctly folded and secreted proteins into the medium and is capable of performing post-translational modifications that are closer to human protein modifications than those produced by *S. cerevisiae* (Cino 1999). Since *P. pastoris* can grow on a simple mineral media and secretes low levels of endogenous proteins, the heterologous protein comprises the major portion of the total protein in the medium thus simplifying the purification process (Lin et al. 2009).

*K. lactis* or milk yeast is one of the few yeast species that can grow on lactose and whey; it is cheap and uses various substrates, as a sole source of carbon and energy (Romanos, Scorer and Clare 1992; Arnold et al. 2012). Its potential as a host for the production of heterologous proteins has been studied especially for low-value products (Romanos, Scorer and Clare 1992). For example, *K. lactis* can efficiently synthesise and secrete fully active foreign proteins, including prochymosin, which is poorly secreted by *S. cerevisiae* (van Dan Berg et al. 1990; Romanos, Scorer and Clare 1992). In addition, this yeast allows rich biomass yields during fermentation at high growth rates (Arnold et al. 2012).

Availability of molecular tools allowed the expression of heterologous proteins and their display on the cell surface (Schreuder et al. 1993; Schreuder et al. 1996; Ueda and Tanaka 2000). Numerous antigens from different pathogens including Hepatitis B virus, porcine epidemic diarrhoea virus, *Actinobacillus pleuropneumoniae*, protozoans were successfully expressed on yeast surface for the development of oral vaccines (Schreuder et al. 1996; Park et al. 2007; Kim et al. 2010a). Thus, unicellular yeast can be the right candidate for a live oral vaccine (Schreuder et al. 1996; Ueda and Tanaka 2000). Figure 1A shows the different group of pathogens against which immunogenic protein(s) was expressed in yeast, while Fig. 1B shows the ways in which yeast can be used for vaccines development.

## YEAST AND IMMUNE RESPONSE

Despite its non-pathogenic nature (*S. cerevisiae*, *P. pastoris*), yeast has been shown to induce immunologic responses in mammals and is avidly taken up by DCs (dendritic cells) and macrophages (Stubbs et al. 2001; Heintel et al. 2003). Immunogenic nature of yeast cells was believed due to polysaccharides beta-1, 3-D-glucan (BGs), and mannan that allows efficient phagocytosis of yeast cells by APCs (antigen-presenting cells) including DCs, followed by generation of danger signals during microbial

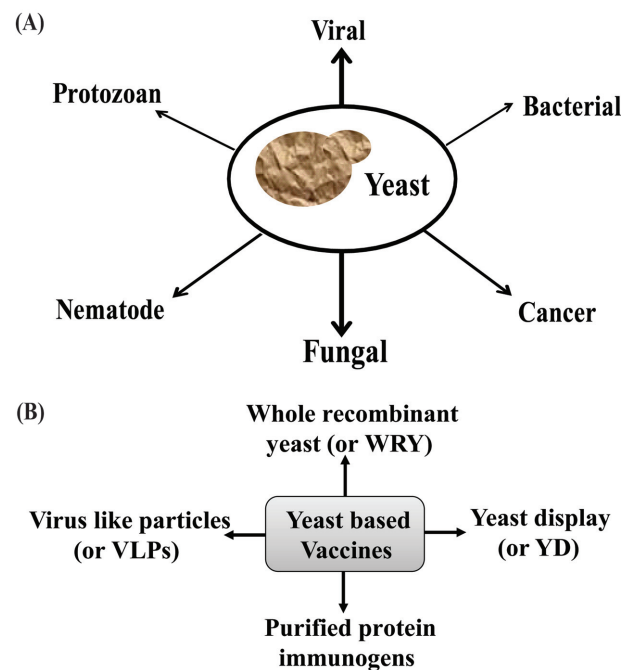

Figure 1. Yeast-based vaccines. (A) Schematic showing the application of yeast in an expression of antigens against diverse clinical conditions. (B) Various ways in which yeast-based vaccines are or can be used.

infection. These carbohydrates moieties possess strong adjuvant nature that is easily detected by pattern recognition receptors like toll-like receptors (TLRs) and mannan receptors on APCs (Munson et al. 2008).

Yeast cells expressing foreign antigens is degraded in proteasomes and latter displayed on the cell surface through MHC-I, which is recognised by CD81 (cluster of differentiation) CTLs (cytotoxic T lymphocytes) that leads in proliferation, maturation and activation of antigen-specific CD81 CTLs. In another case, yeast cells can also be degraded in endosomes, and antigenic peptides are again presented on the cell surface through MHC-II, which are recognised by CD41 T helper cells that are important in T-cell immunity. Apart from that yeast cells are also known for their ability to enhance expression of MHC (major histocompatibility complex) and co-stimulatory molecules on a surface of DCs or APCs (Stubbs et al. 2001; Franzusoff et al. 2005; Bernstein et al. 2008; Munson et al. 2008; Remondo et al. 2009) thereby allowing efficient activation of T lymphocytes for cell-mediated immunity.

It is also evident that yeast cells (budding yeast and *Candida*) are also able to increase the interleukin (IL) secretion including IL 6, 8, 12, 18, TNF, MCP-1/CCL2 along with IL-1beta. The same study also showed an increased expression of TLR including TLR1, 2, 4, 6 along with dectin (Saegusa et al. 2009). Application of Zymosan (from yeast cells) to mast cells increased dectin-1 expression and also leads to induction of dectin-1-dependent reactive oxygen species (ROS) generation (Yang and Marshall 2009) while yeast glycoprotein was able to induce proliferation of human lymphocytes (Darroch, Christmas and Barnes 1994). Applications of VLPs derived from yeast were able to activate HIV-1 Gag-specific CD8<sup>+</sup> T cells (Mizukoshi et al. 2009). The inclusion of yeast cell wall extract in the feed of pig was able to boost innate and acquired immunity and growth (Sauerwein, Schmitz and Hiss 2007).

Recently it is also reported that M1-like macrophages had a higher yeast uptake capacity compared to M2-like macrophages and both types of macrophages were equally efficient in their ability to take opsonised yeast cells. Apart from that, uptake of yeast by macrophages also leads to an increase in surface markers (example HLAII and CD86). Moreover, mRNA levels of pro-inflammatory cytokines, such as TNF- $\alpha$ , IL-12, and IL-6, increased, while that of anti-inflammatory mediator's remains changed (Seif et al. 2016). It is also shown that whole recombinant budding yeast expressing foreign antigens can confer protective cell-mediated immunity against a tumour (Stubbs et al. 2001). It is important to mention that yeast-based vaccines were able to generate antigen-specific responses independent of the viability of the cells itself (Lu et al. 2004) and magnitude of immune response were of the same level on an application of either dead or alive cells (Franzoso et al. 2005). Components of yeast cell wall were able to interact with DCs cell and macrophage receptors (TLR-2, TLR-4, TLR-6, CD14, Dectin-1, Dectin-2, DEC-205 and the mannose receptor family) and are highly efficient in stimulating antigen presentation (Gantner et al. 2003; Underhill and Gantner 2003). Zymosan from yeast cell wall was able to increase the expression of many pro-inflammatory genes (Tada et al. 2002; Underhill and Gantner 2003; Ikeda et al. 2005). Thus, from looking at these studies, it can be said that yeast cell is able to mount and modulate the immune response, further showing the significance of inherent adjuvant nature of yeast.

## OPTIMISATION OF TRANSCRIPTION AND TRANSLATIONAL APPARATUS

Quick and cost-effectiveness are two important elements associated with the use of yeast for the expression of heterologous proteins for clinical applications. To achieve these endpoint objectives, it is important that the target gene(s) expressed in yeast remain stable. Although several vector systems are available for efficient expression of heterologous proteins in yeast. Under such a condition, it is important that one must find the most suitable and economically viable strategy for protein expression. The strategy employed in protein expression should also allow rapid and economical protein purification without affecting native protein property especially its immunogenic nature. In another case, protein purification may not be required (example in whole recombinant yeast and yeast display as discussed in the later section of the review) and increased expression and display of protein on yeast surface (without compromising on immunogenic property) may be important. Thus, it is important to consider the endpoint application before deciding the strategy for expression of heterologous proteins and accordingly selects the expression system (to be it host i.e. yeast species as well as expression vectors).

Although one can use episomal-based expression vector, these expression vectors need continuous selection pressure for maintaining the clones. Selection through the antibiotic does not sound good in case of whole recombinant yeast and yeast display. Auxotrophic selection can help in getting rid of antibiotics but poor and slow growth in these growth media is another issue. Although the application of integrating the vector allows long-term maintenance of the clones on rich media even in the absence of selection pressure, the number of copies of antigen that can be integrated through integrating vector is another issue

Thus, for efficient and economical expression of heterologous protein in yeast, a novel strategy that can surmount issue mentioned earlier is a must. Efforts over the years have led to the development of various strategies as pointed here. The detailed strategy is beyond the scope of present review and readers are advised to check original papers that describe the experimental strategy in sufficient detail.

For permanent, long-term maintenance and expression of a clone(s) of interest, a gene can be integrated into non-transcriptional spaces (NTSs) of yeast rRNA gene as chromosomal integration sites. One can also integrate a clone of interest at yeast chromosomal centromere or telomere regions (Hohmann 1987). To overcome the problem of copy number non-transcribed spacers, NTS1 and NTS2, in the 5' and 3' end flanking regions of 5S ribosomal DNA can be used (Wery et al. 1997; Klabunde et al. 2002). For example, by using this strategy high copy number of mammalian myostatin was integrated into rDNA region of budding yeast and antibiotic selection marker was removed using the Cre-LoxP system to rule out the side effects that may arise due to the presence of an antibiotic gene. This allows maintenance of yeast in nutrient-rich media for rapid growth and expression of mammalian myostatin for two years. Further oral application of these yeast cells was able to induce an immune response (Zhang et al. 2012). Similarly, new, multiple integration cassettes were developed by exploiting the NTS of rDNA in combination with defective selection markers. In this case, 5' and 3'-fragments of rDNA-NTS2 were used for expression cassettes with a set of URA3, LEU2, HIS3 and TRP1 selection markers with truncated promoters of different lengths. The number of integrated cassettes may range up to 30 copies. This approach was tested by constructing yeast strain capable of expressing capsid protein of red-spotted grouper necrosis virus (RG-NNVCP). The oral administration of this recombinant yeast was able to mount efficient immune responses (Moon et al. 2016). In another recent study, using *P. pastoris* expression strategy was devised that allows efficient expression and easy purification of HPV16 L1 protein by inserting codon optimised  $\alpha$ -factor signal sequence (Mariz et al. 2015). Thus, it can be said that available tools and improvement over the years allows efficient expression of heterologous proteins without compromising the ability of expressed proteins to interact with immune cells or molecules and mount an immune response.

## EXAMPLE OF PROTEINS EXPRESSED IN YEAST AGAINST A DIFFERENT GROUP OF PATHOGENS

### Viral proteins

The high rate of mutation, the absence of DNA repair systems and requirement of a host or cellular environment put serious challenges in the development of vaccines against viral infections. Appearance or emergence of newer and lethal viral strains now and then or appearance of new pathogenic viruses (example H1NI, H1N5 and more recently Ebola and Zika virus) poses another hurdle in vaccine development against viral infections. Due to the reasons mentioned earlier, vaccines against even common viral infection like Hepatitis C remains a challenge. But the better understanding of the viral genome, molecular techniques, and protein chemistry allow mass production of important viral proteins for use as prophylactic vaccines. For example, the introduction of several copies of cassettes encoding the major Hepatitis B surface protein into *S. cerevisiae* proved

useful for vaccine applications (Jacobs *et al.* 1989). DENV envelope (E) protein-based VLPs generated by using *P. pastoris* shows encouraging results against dengue (Mani *et al.* 2013) and purification of gp120 of HIV-1 from *P. pastoris* shows positive response against HIV (Scorer *et al.* 1993). *H. polymorpha* allows high-level expression and purification of gp96 of HBV, which can effectively induce HBV-specific CTL response in immunised mice (Li *et al.* 2011). Heat-killed whole recombinant budding yeast-based vaccine (GS-4774) against Hepatitis B virus reached to phase-II of clinical trials (Lok *et al.* 2016). As a proof of concept, we mentioned some of the studies where expression of viral proteins in yeasts was able to induce an immune response against viral infection, and the list of various viral proteins expressed in different yeasts species are shown in Table 1.

### Protozoan proteins

The causative agents of human malaria are four species of protozoan parasites belonging to the genus *Plasmodium*. Although *P. falciparum* is responsible for the highest mortality rate among the four species of human malaria parasites, *vivax* malaria is responsible for the most recurrent form of malaria (Mendis *et al.* 2001). Antibodies raised by using Pvs25 and Pvs28 expressed and purified from yeast were able to block transmission of *P. vivax* in mice (Duffy, Pimenta and Kaslow 1993). Chimeric protein 2.9 (PfCP-2.9) secreted by *P. pastoris* was able to induce the generation of antibodies and inhibit the growth of *P. falciparum* CC1/HN and 3D7 lines in rabbit and rhesus monkeys (Pan *et al.* 2004). Table 2 shows the list of protozoan spp. proteins expressed in different yeast as a potential vaccine against malaria. Compared to budding yeast, P30P2MSP1(19) secreted by *P. pastoris* generate high and uniform antibodies titer in rabbit (Brady *et al.* 2001). Thus, the problem of the mass culture of *Plasmodium* species for vaccine development may be overcome by expressing surface proteins (from different stages) in yeast, and it is expected that in near future, yeast expressing *Plasmodium* protein(s) may occupy an important place in malaria treatment.

### Bacterial proteins

Due to the availability of different antibiotics and ability, to culture bacteria of almost all pathogenic species (except members of *Mycobacteria* genus) research in the use of yeast for vaccine development against bacterial infection(s) is limited. As a result, compared to a virus or protozoa few reports are available where bacterial proteins were expressed in yeast for vaccines development. For example, administration of mycobacterial heparin-binding haemagglutinin adhesin (HBHA) expressed and purified from *P. Pastoris* was able to induce Th1-type immunity and reduced bacterial load in mice spleen (Kohama *et al.* 2008). Oral application of whole recombinant budding yeast expressing ApxIIA provides protection against *A. pleuropneumoniae* (Shin *et al.* 2007, 2013). The list of bacterial protein expressed in yeast for use as vaccines are listed in Table 3.

### Fungal proteins

Although the incidence of fungal infection is less compared to bacterial or viral infection, the eukaryotic nature of fungal cells poses an important challenge, and thus, the development of therapeutic measure against fungal infection is slow. For example, only limited compounds are available for treatment of fungal infection and development of a vaccine against fungal infection remains a challenge. And as a result, scientists focused

their attention on cell wall component as a potential target for a medical intervene. Conserved nature of cell wall components particularly polysaccharides like beta glucan, mannans, zymogen and their absence in the host including mammals, poultry birds make them a suitable candidate for inducing the immune response against fungal infection. The use of a vaccine preparation using hemolysin expressed in *S. cerevisiae* vector has been reported and observed that the empty vector also conferred partial protection in an infection model of coccidioidomycosis (Capilla *et al.* 2009). Administration of heat-killed yeast (HKY) provides effective protection against aspergillosis and coccidioidomycosis (Stevens, Clemons and Liu 2011), coccidioidomycosis (Capilla *et al.* 2009), candidiasis. Injection of budding yeast expressing *P. brasiliensis* gp43 was able to protect mice from paracoccidioidomycosis (PCM) (Assis-Marques *et al.* 2015) while application of plasma bead coated with *C. albicans* cytoplasmic proteins provides a positive immune response against candida infection (Ahmad *et al.* 2012). Thus, it can be said that vaccine against fungal infection is still a wish and yeast-based vaccine may emerge as an important way in therapy against fungal infection.

### Nematodes and ticks proteins

In this section, we highlighted some of the studies where yeast has been used for expression of proteins from nematodes or worms and ticks or arthropods from the point of therapeutic measures. For example, tetraspanin surface antigen protein (Sm-TPS2) expressed and purified from yeast showed positive response against *Schistosoma mansoni* in mice (Cheng *et al.* 2013). Administration of glutathione S-transferase 1 (Na-GST-1) purified from yeast shows encouraging results against *Necator americanus* infection (Zhan *et al.* 2010; Plieskatt *et al.* 2012; Curti *et al.* 2014) while aspartyl protease inhibitor (API-1) purified from yeast showed a protective immune response against *Ancylostoma caninum* and *Ancylostoma ceylanicum* (Delaney *et al.* 2005). Application of proteins expressed and purified from yeast shows protective immunity against *Boophilus microplus* (García-García *et al.* 1998, 2000). Application of proteins expressed in yeast showed positive response against *Ascaris suum* (Wei *et al.* 2017). Similarly, *S. mansoni* Sm14 antigen expressed in *P. pastoris* showed positive response in preliminary clinical trials (Damasceno, Ritter and Batt 2017). Different nematode and ticks' proteins expressed in yeast are shown in Table 4.

## CANCER-ASSOCIATED PROTEINS

For any successful or positive response against a tumour, it is important that the yeast-based vaccine should be able to generate the CD81 CTLs cells important in both recognition and killing of tumour cell(s). Therefore, yeast cells capable of expressing a proper and optimum level of tumour-specific or tumour-associated antigens need to be constructed. Numerous clinical studies with this strategy are under way and reviewed elsewhere (Ardiani, Higgins and Hodge 2010). In one preclinical study using *S. cerevisiae* expressing brachyury (embryonic transcription factor) was able to activate human T cells (Heery *et al.* 2015). *S. cerevisiae*-derived microparticles conjugated to ova albumin was recognised and internalised by DCs and shown to induce an immune response against a tumour (Pan *et al.* 2015). Another study reported the phase I trial of a recombinant *S. cerevisiae* -CEA vaccine (GI-6207) in adults with metastatic CEA-expressing carcinoma (Bilusic *et al.* 2014) and NY-ESO-1

**Table 1.** Table showing list of various viral proteins expressed in various yeast species.

| Yeast species                                      | Source of antigen/Diseases                                  | Antigen/Immunogen                                                    | Expression strategy          | Reference                |
|----------------------------------------------------|-------------------------------------------------------------|----------------------------------------------------------------------|------------------------------|--------------------------|
| <i>S. cerevisiae</i>                               | Papillomavirus/Human Papilloma                              | HPV16 L1 protein                                                     | *Virus like particle         | Kim et al. 2007          |
|                                                    |                                                             | VP1                                                                  | Virus like particle          | Zielonka et al. 2012     |
|                                                    |                                                             | HPV-11 L1                                                            | Virus like particle          | Brown et al. 2001        |
|                                                    |                                                             | Papillomavirus type 16 L1 protein                                    | Purified protein             | Park et al. 2008         |
|                                                    |                                                             | Type 16 L1 protein                                                   | Virus like particle          | Kim et al. 2010b         |
|                                                    |                                                             | HPV16                                                                | Virus like particle          | Kim et al. 2014          |
|                                                    |                                                             | HPV16 L1                                                             | Virus like particle          | Woo et al. 2007          |
|                                                    |                                                             | HPV18 L1                                                             | Virus like particle          | Woo et al. 2008          |
|                                                    |                                                             | VP1                                                                  | Virus like particle          | Sasnauskas et al. 2002   |
|                                                    |                                                             | HPV16 E7 oncoprotein epitopes                                        | Virus like particle          | Pumpens et al. 2002      |
|                                                    | Hepatitis B virus/Hepatitis                                 | Capsid proteins L1 or L1 plus L2                                     | Virus like particle          | Lowé et al. 1997         |
|                                                    |                                                             | HPV58 L1                                                             | Virus like particle          | Kwag et al. 2012         |
|                                                    |                                                             | HBsAg                                                                | Virus like particle          | Kee et al. 2008          |
|                                                    |                                                             | Hepatitis B surface antigen                                          | Purified protein             | Jacobs et al. 1989       |
|                                                    |                                                             | Hepatitis B surface antigen (HBsAg)                                  | Virus like particle          | Hadiji-Abbes et al. 2013 |
|                                                    |                                                             | Hepatitis B virus (HBV) X, surface (S), and Core antigens (X-S-Core) | Whole recombinant yeast      | King et al. 2014         |
|                                                    |                                                             | Surface protein GS-4774                                              | Whole recombinant yeast      | Gaggar et al. 2014       |
|                                                    |                                                             | HBsAg                                                                | Virus like particle          | Pleckaityte et al. 2015  |
|                                                    |                                                             | Hepatitis B core protein                                             | Purified protein             | Zhang et al. 2015a       |
|                                                    |                                                             | Hepatitis B surface antigen                                          | Purified protein             | Hauser et al. 1987       |
|                                                    | Hepatitis C virus/Hepatitis                                 | Hepatitis B surface antigen                                          | Purified protein             | Tan et al. 1994          |
|                                                    |                                                             | HCV NS3-Core fusion protein                                          | Whole recombinant yeast      | Haller et al. 2007       |
|                                                    | Enterovirus 71/Foot, hand and mouth disease                 | EV71 structural protein                                              | Virus like particle          | Li et al. 2013           |
|                                                    |                                                             | EV71 structural proteins VP1-VP                                      | Virus like particle          | Wang et al. 2016a        |
|                                                    |                                                             | VP1                                                                  | Virus like particle          | Lin et al. 2015          |
|                                                    |                                                             | ChiEV-A71 VLPs                                                       | Virus like particle          | Zhao et al. 2015         |
| Coxsackievirus A16/Foot, hand and mouth disease    | ChiEV-A71 VLPs                                              | Virus like particle                                                  | Zhao et al. 2015             |                          |
|                                                    | P1 and 3CD                                                  | Virus like particle                                                  | Zhao et al. 2013             |                          |
| Japanese encephalitis virus/Encephalitis           | Japanese encephalitis virus envelope protein (mannoprotein) | Yeast surface display                                                | Upadhyaya and Manjunath 2009 |                          |
| Puumala hantavirus (PUUV)/Hemorrhagic Fever        | Nucleocapsid protein                                        | Purified protein                                                     | Dargeviciute et al. 2002     |                          |
| Hamster polyomavirus/Epithelioma (Syrian hamsters) | Hamster polyomavirus (VP1)                                  | Virus like particle                                                  | Gedvilaite et al. 2000       |                          |
| Parvovirus/Aplastic crisis                         | Capsid protein VP1                                          | Virus like particle                                                  | Mazeike et al. 2012          |                          |
|                                                    | Parvovirus B19/Aplastic crisis                              | VP1 and VP2                                                          | Virus like particle          | Penkert et al. 2017      |
| Dengue virus/Dengue                                | VP1 and VP2                                                 | Virus like particle                                                  | Chandramouli et al. 2013     |                          |
|                                                    | Dengue envelope domain III (scEDIII)                        | Purified protein                                                     | Nguyen et al. 2013           |                          |
| HIV-1/AIDS                                         | HIV-1 envelope (Env) glycoprotein                           | Yeast surface display                                                | Wang et al. 2018a            |                          |
|                                                    | Retroviral Gag protein                                      | Virus like particle                                                  | Sakuragi et al. 2002         |                          |
|                                                    | Gag protein                                                 | Virus like particle                                                  | Tomo et al. 2013             |                          |

Table 1. Continued

| Yeast species      | Source of antigen/Diseases                                                                                                         | Antigen/Immunogen                                          | Expression strategy                        | Reference                                        |
|--------------------|------------------------------------------------------------------------------------------------------------------------------------|------------------------------------------------------------|--------------------------------------------|--------------------------------------------------|
|                    | Red-spotted grouper NNV (RGNNV)/Nervous necrosis                                                                                   | Capsid protein                                             | Whole recombinant yeast (oral application) | Cho et al. 2017                                  |
|                    | Simian-human immunodeficiency chimeric viruses/AIDS                                                                                | A pool of SHIVenv.B derived from 16 acute HIV-1 infections | Chimeric virus                             | Krebs et al. 2016                                |
|                    | Varicella-zoster virus/Chickenpox                                                                                                  | Varicella-zoster virus (VZV) gE                            | Virus like particle                        | Welsh et al. 1999                                |
|                    | Nervous necrosis virus (NNV)/Nervous necrosis                                                                                      | RGNNV                                                      | Virus like particle                        | Wi et al. 2015                                   |
|                    | Rotavirus/Gastroenteritis                                                                                                          | RGNNV capsid protein<br>Rotavirus VP2, VP6 and VP7         | Virus like particle<br>Virus like particle | Choi et al. 2013<br>Rodríguez- Limas et al. 2011 |
|                    | Goose hemorrhagic polyomavirus/Hemorrhagic nephritis and enteritis of geese (HNEG)                                                 | VP1                                                        | Virus like particle                        | Zielonka et al. 2006                             |
|                    | Cottontail rabbit papillomavirus (CRPV)/Cancer                                                                                     | Capsid proteins L1 or L1 + L2                              | Virus like particle                        | Jansen et al. 1995                               |
|                    | New castle virus/Mild flu-like symptoms or conjunctivitis (an infection of the eye that is also called pink eye) and/or laryngitis | Hemagglutinin-neuraminidase                                | Purified protein                           | Khulape et al. 2015                              |
| <i>P. pastoris</i> | Dengue virus/Dengue                                                                                                                | DENV envelope protein domain III (EDIII)                   | Virus like particle                        | Ramasamy et al. 2018                             |
|                    |                                                                                                                                    | Dengue Virus 4 Envelope Glycoprotein                       | Virus like particle                        | Khetarpal et al. 2017                            |
|                    |                                                                                                                                    | DENV-2 and DENV-3 envelope (E) glycoproteins,              | Virus like particle                        | Poddar et al. 2016                               |
|                    |                                                                                                                                    | DENV1-4                                                    | Virus like particle                        | Liu et al. 2014                                  |
|                    |                                                                                                                                    | DENV-2 E                                                   | Virus like particle                        | Mani et al. 2013                                 |
|                    |                                                                                                                                    | Envelope Glycoprotein E                                    | Virus like particle                        | Liu et al. 2010                                  |
|                    |                                                                                                                                    | DENV-1                                                     | Virus like particle                        | Tang et al. 2012                                 |
|                    |                                                                                                                                    | Dengue virus type-2 (DENV-2) envelope domain III (EDIII)   | Virus like particle                        | Arora et al. 2013                                |
|                    |                                                                                                                                    | Envelope domain III protein                                | Purified protein                           | Etemad et al. 2008                               |
|                    |                                                                                                                                    | Envelope protein (E1-E4)                                   | Virus like particle                        | Rajpoot et al. 2018                              |
|                    | Rock bream iridovirus (RBIV)/Morbidity and mortality in fish                                                                       | Recombinant major capsid protein (rMCP)                    | Whole recombinant yeast                    | Seo et al. 2013                                  |
|                    | <i>M. tuberculosis</i> /Hepatitis                                                                                                  | Tbbsp70-HBcAg (18-27)                                      | Purified protein                           | Peng et al. 2006                                 |
|                    | Dengue virus type 2 and Hepatitis B virus/Dengue, Hepatitis B                                                                      | Den2E-HBsAg                                                | Virus like particle                        | Bisht et al. 2002                                |
|                    | Coxsackievirus A/Hand, foot and mouth disease (HFMD)                                                                               | P1 and 3CD                                                 | Virus like particle                        | Zhou et al. 2016                                 |
|                    |                                                                                                                                    | P1 and 3CD proteins of CA16                                | Virus like particle                        | Zhang et al. 2016                                |
|                    | Enterovirus/Hand, foot and mouth disease (HFMD)                                                                                    | P1 and 3CD proteins of EV71                                | Virus like particle                        | Zhang et al. 2015b                               |
|                    |                                                                                                                                    | P1 precursor and 3CD protease                              | Virus like particle                        | Zhang et al. 2018                                |

Table 1. Continued

| Yeast species                                                                                                                                                                | Source of antigen/Diseases                                                         | Antigen/Immunogen                                                                                         | Expression strategy                                   | Reference               |                           |
|------------------------------------------------------------------------------------------------------------------------------------------------------------------------------|------------------------------------------------------------------------------------|-----------------------------------------------------------------------------------------------------------|-------------------------------------------------------|-------------------------|---------------------------|
|                                                                                                                                                                              | Hepatitis B virus/Hepatitis                                                        | HBsAg and HEnAg fusion protein                                                                            | Virus like particle                                   | Li et al. 2004          |                           |
|                                                                                                                                                                              |                                                                                    | HBsAg                                                                                                     | Virus like particle                                   | Zahid et al. 2015       |                           |
|                                                                                                                                                                              |                                                                                    | Core protein (HBc)                                                                                        | Virus like particle                                   | Freivalds et al. 2011   |                           |
|                                                                                                                                                                              |                                                                                    | Recombinant hepatitis B surface antigen                                                                   | Purified protein                                      | Hardy et al. 2000       |                           |
|                                                                                                                                                                              |                                                                                    | HBsAg, HSP70 (1–370)                                                                                      | Whole recombinant yeast                               | Zeng et al. 2003        |                           |
|                                                                                                                                                                              |                                                                                    | HBsAg                                                                                                     | Virus like particle                                   | Gurramkonda et al. 2009 |                           |
|                                                                                                                                                                              |                                                                                    | Hepatitis B surface antigen                                                                               | Virus like particle                                   | Lu'nsdorf et al. 2011   |                           |
|                                                                                                                                                                              |                                                                                    | Recombinant hepatitis B surface antigen                                                                   | Virus like particle                                   | Liu et al. 2008         |                           |
|                                                                                                                                                                              |                                                                                    | Hepatitis C virus/Hepatitis                                                                               | HCV CoreE1E2 protein                                  | Purified protein        | Fazlalipour et al. 2015   |
|                                                                                                                                                                              |                                                                                    |                                                                                                           | Hepatitis C core protein (HCCAg)                      | Virus like particle     | Acosta-Rivero et al. 2001 |
| Papillomavirus type 16/Papilloma/cancer                                                                                                                                      | HPV16L1/18L1                                                                       | Virus like particle                                                                                       | Hanumantha Rao et al. 2011                            |                         |                           |
|                                                                                                                                                                              |                                                                                    | Virus like particle                                                                                       | Jiang et al. 2011                                     |                         |                           |
|                                                                                                                                                                              |                                                                                    | Virus like particle                                                                                       | Gupta et al. 2017                                     |                         |                           |
|                                                                                                                                                                              |                                                                                    | Purified protein                                                                                          | Coimbra et al. 2011                                   |                         |                           |
|                                                                                                                                                                              |                                                                                    | Purified protein                                                                                          | Bredell et al. 2018                                   |                         |                           |
|                                                                                                                                                                              |                                                                                    | Virus like particle                                                                                       | Wang et al. 2016b                                     |                         |                           |
|                                                                                                                                                                              |                                                                                    | Virus like particle                                                                                       | Zhou et al. 2015                                      |                         |                           |
| Infectious bursal disease virus/Immunosuppression Giant salamander iridovirus/Mortality in Chinese giant salamander Duck Hepatitis 1/Hepatitis (in duck) Influenza virus/Flu | O-MCP                                                                              | VP1 protein                                                                                               | Purified protein                                      | Wang et al. 2014        |                           |
|                                                                                                                                                                              |                                                                                    | Recombinant Hemagglutinin protein of novel H1N1                                                           | Purified protein                                      | Athmaram et al. 2011    |                           |
|                                                                                                                                                                              |                                                                                    | Hemagglutinin protein H5 haemagglutinin                                                                   | Purified protein                                      | Athmaram et al. 2013    |                           |
|                                                                                                                                                                              |                                                                                    | Full-length HA-encoding gene of H5N2 AIV                                                                  | Purified protein                                      | Pietrzak et al. 2016    |                           |
|                                                                                                                                                                              |                                                                                    | Alpha agglutinin                                                                                          | Yeast surface display                                 | Wasilenko et al. 2010   |                           |
|                                                                                                                                                                              |                                                                                    | Hemagglutinin protein                                                                                     | Purified protein                                      | Wang et al. 2018b       |                           |
|                                                                                                                                                                              |                                                                                    | Porcine circovirus type 2 capsid                                                                          | Purified protein                                      | Tu et al. 2013          |                           |
|                                                                                                                                                                              |                                                                                    | HIV envelope protein gp120                                                                                | Purified protein                                      | Scorer et al. 1993      |                           |
|                                                                                                                                                                              |                                                                                    | Bovine herpesvirus-1/Rhinotracheitis, vaginitis, balanoposthitis, abortion, conjunctivitis, and enteritis | Bovine herpesvirus type 1 (BHV-1) glycoprotein D (gD) | Purified protein        | Zhu et al. 1999           |
|                                                                                                                                                                              |                                                                                    |                                                                                                           | Bovine herpesvirus-1 (BHV-1) glycoprotein D (gD)      | Purified protein        | Zhu et al. 1997           |
| Classical swine fever virus (CSFV)/Swine fever (CSF) or hog cholera                                                                                                          | Glycoprotein E2                                                                    | Purified protein                                                                                          | Cheng et al. 2014                                     |                         |                           |
|                                                                                                                                                                              |                                                                                    |                                                                                                           |                                                       |                         |                           |
| Avian influenza virus/Influenza                                                                                                                                              | Influenza A/H5N1 neuraminidase                                                     | Purified protein                                                                                          | Yongkiettrakul et al. 2009                            |                         |                           |
|                                                                                                                                                                              |                                                                                    |                                                                                                           |                                                       |                         |                           |
| Bursal disease virus (IBDV)/Bursal disease                                                                                                                                   | VP2 gene of the Edgar strain of IBDV, hypervariable region of the VP2 gene (hvVP2) | Purified protein                                                                                          | Villegas et al. 2008                                  |                         |                           |



Table 1. Continued

| Yeast species        | Source of antigen/Diseases                                                                                                                                | Antigen/Immunogen                                                                                                     | Expression strategy | Reference             |
|----------------------|-----------------------------------------------------------------------------------------------------------------------------------------------------------|-----------------------------------------------------------------------------------------------------------------------|---------------------|-----------------------|
|                      | Avian leukosis virus/Cancer in chickens                                                                                                                   | Recombinant J subgroup of avian leukosis virus (ALV-J) gp85 protein                                                   | Purified protein    | Jing et al. 2018      |
|                      | <i>H. pylori</i> /Gastritis, peptic ulcer disease and gastric cancer                                                                                      | Alkyl hydroperoxide reductase (AhpC)                                                                                  | Purified protein    | O'Riordan et al. 2012 |
| <i>H. polymorpha</i> | Human Papillomavirus/Papilloma/cancer                                                                                                                     | HPV52L1                                                                                                               | Virus like particle | Liu et al. 2015       |
|                      | Hepatitis B/Hepatitis                                                                                                                                     | VrHB-IB                                                                                                               | Purified protein    | Caetano et al. 2017   |
|                      | Foot-and-mouth disease virus/Foot-and-mouth disease                                                                                                       | Capsid protein complex epitopes of VP1, cholera toxin B subunit                                                       | Purified protein    | Song et al. 2004      |
|                      | Hepatitis C virus/Hepatitis                                                                                                                               | Envelope glycoprotein E1                                                                                              | Virus like particle | He et al. 2009        |
|                      |                                                                                                                                                           | Envelope glycoprotein E1 ectodomain                                                                                   | Purified protein    | Lorent et al. 2008    |
|                      | Bovine viral diarrhea virus (BVDV), Classical swine fever virus (CSFV), Feline leukemia virus (FeLV), West Nile virus (WNV)/Infectious disease in animals | Membrane integral small surface protein (dS) of the duck hepatitis B virus fused with virus antigen infecting animals | Virus like particle | Wetzel et al. 2018    |
|                      | Porcine circovirus type 2b (PCV2b)/Postweaning multisystemic wasting disease (PMWS) in pigs                                                               | PCV2b capsid protein (CP)                                                                                             | Virus like particle | Xiao et al. 2018      |
| <i>Y. lipolytica</i> | Nervous necrosis virus (NNV)/Viral encephalopathy and retinopathy in marine fish                                                                          | Capsid protein of red-spotted grouper nervous necrosis virus (RGNNV-CP)                                               | Virus like particle | Luu et al. 2017       |

\*VLPs are also purified protein(s).

purified from budding yeast was taken up by DCs and displayed by MHC class I molecules (Wadle et al. 2010). Recombinant *S. cerevisiae*-based vaccine expressing the T315I-mutated BCR-ABL antigen was able to reduce or eliminated BCR-ABL (T315I) leukaemia cells from the peripheral blood (Bui et al. 2010) without affecting normal BCR-ABL cells. Injection of heat-killed budding yeast expressing the tumour-associated antigen CEA induces CEA-specific immune responses, reduces tumour burden and extends overall survival in CEA-Tg mice (Wansley et al. 2008). BG from mutated budding yeast inhibits tumour metastasis via activation of macrophages and NK cells (Yoon et al. 2008). Whole recombinant budding yeast expressing brachyury protein allows activation and proliferation of brachyury-specific CD4<sup>+</sup> and CD8<sup>+</sup> T cells in vitro and these activated cells were able to kill tumour cells in absence of any obvious toxicity (Hamilton et al. 2013).

Rabbit anti-hCG $\beta$ -oHL $\alpha$  IgG generated by expression and purification of chimeric hCG $\beta$ -oLH $\alpha$  from budding yeast was able to inhibit the proliferation of hCG-expressing human colorectal cancer cells (LS-174, HCT-116, HCT-15 and KM-12) and also neutralise the bioactivity of hCG (Jiang et al. 2010). In another study, yeast cells were used for expression of melanoma protein for use as a prophylactic vaccine against a melanoma and despite the lack of information about epitopes recognised by MHC molecules and expressed protein was able to protect mice from tumour development (Riemann et al. 2007). B7-2(225)-scFv (FRP5) expressed and purified from *P. pastoris* yeast retains activity and localises to f ErbB2-expressing target cells was able to

generate a costimulatory signal that results in enhanced proliferation of syngeneic T cells (Gerstmayer et al. 1997). Recombinant budding yeast expressing CEA acts as potential vaccine carrier and resulted in increased gene expression of IL-12, IFN $\gamma$  and GM-CSF (Bernstein et al. 2008; Remondo et al. 2009). Different tumour antigens expressed in yeast are shown in Table 5.

After looking at some of the studies mentioned already, it can be concluded that expression of tumour-specific or tumour-associated antigens in yeast and the application of whole recombinant yeast is able to raise an immune response against a tumour with a high degree of specificity and reduce tumour burden and extended survival rate. Hence, yeast-based vaccine against tumour holds great value in cancer therapy and encourages further research.

## WHOLE RECOMBINANT YEAST-BASED VACCINES

Although vaccination of individuals with a peptide-based vaccines (example Hepatitis B) is now routine practice throughout the world, still issues related to the stability of peptide-based vaccines and a special requirement for storage, transportation and shelf life warrants need for an alternative of peptide vaccines. So far, the cellular environment has been the most suitable for long-term stability and maintenance of protein structure, thus problem associated with stability of protein antigen can be overcome by expressing and the use of the whole cell.

**Table 2.** Table showing list of various protozoan proteins expressed in various yeast species.

| Yeast species                           | Source of antigen/Diseases               | Antigen/Immunogen                                                                  | Strategy                                                | References                 |                           |
|-----------------------------------------|------------------------------------------|------------------------------------------------------------------------------------|---------------------------------------------------------|----------------------------|---------------------------|
| <i>S. cerevisiae</i>                    | <i>P. falciparum</i> /Malaria            | Falc2.3, p195A, SERAI, Pfs25 gp195                                                 | Purified protein                                        | Bathurst et al. 1993       |                           |
|                                         |                                          | Pfs25 surface protein                                                              | Purified protein                                        | Chang et al. 1992          |                           |
|                                         |                                          | 15 defined cytotoxic T lymphocyte (CTL) epitopes form plasmodium                   | Purified protein                                        | Kaslow and Shiloach 1994   |                           |
|                                         |                                          | MSP3                                                                               | Virus like particle                                     | Gilbert et al. 1997        |                           |
|                                         |                                          | rMSP1(19)                                                                          | Purified protein                                        | Hisaeda et al. 2002        |                           |
|                                         |                                          | TBV25H                                                                             | Purified protein                                        | Kumar et al. 2000          |                           |
|                                         |                                          | Pfs25 and Pfs28                                                                    | NA                                                      | Noronha et al. 1999        |                           |
|                                         |                                          | Pfs25                                                                              | Purified protein                                        | Gozar et al. 1998          |                           |
|                                         |                                          | MSP1                                                                               | Purified protein                                        | Stowers et al. 2000        |                           |
|                                         |                                          | TBV25H, Pfs25 EGF domains 1–4, MSP1 <sub>19</sub> , P30P2MSP1 <sub>19</sub>        | Purified protein                                        | Stowers et al. 2001a       |                           |
|                                         |                                          |                                                                                    | Purified protein                                        | Stowers et al. 2001b       |                           |
|                                         |                                          |                                                                                    |                                                         |                            |                           |
|                                         | <i>P. vivax</i> /Malaria                 | Circumsporozoite (VIVAX-1) protein                                                 | Purified protein                                        | Collins et al. 1989        |                           |
|                                         |                                          | Circumsporozoite (CSV) protein                                                     | Virus like particle                                     | Vanloubbeeck et al. 2013   |                           |
|                                         |                                          | Pvs25 and Pvs28                                                                    | Purified protein                                        | Sattabongkot et al. 2003   |                           |
|                                         | <i>T. gondii</i> /Zoonosis toxoplasmosis | Microneme protein 16                                                               | Yeast surface display                                   | Wang et al. 2018c          |                           |
| <i>P. pastoris</i>                      | <i>P. yoelii</i> /Malaria                | MSP1(19)                                                                           | Purified protein                                        | Hirunpetcharat et al. 2003 |                           |
|                                         | <i>P. falciparum</i> /Malaria            | C-terminal region of the merozoite surface protein 1 (MSP119)                      | Purified protein                                        | Zhang et al. 2006          |                           |
|                                         |                                          | F2 domain of EBA-175                                                               | Purified protein                                        | Yadava and Ockenhouse 2003 |                           |
|                                         |                                          | MSP1-42                                                                            | Purified protein                                        | Zhang et al. 2002          |                           |
|                                         |                                          | MSP-1(19), AMA-1 (domains I and II), AMA-1 + MSP-1(19), and fused AMA-1/MSP-1(19)) | Purified protein                                        | Arnot et al. 2008          |                           |
|                                         |                                          | Apical membrane antigen 1 (PfAMA1)                                                 | Purified protein                                        | Remarque et al. 2008       |                           |
|                                         |                                          | 19-kilodalton C-terminal fragment of merozoite surface protein 1.                  | Purified protein                                        | Faber et al. 2007          |                           |
|                                         |                                          |                                                                                    |                                                         |                            |                           |
|                                         |                                          | <i>P. vivax</i> /Malaria                                                           | AMA-1 and MSP-1                                         | Purified protein           | Rocha et al. 2017         |
|                                         |                                          |                                                                                    | Ectodomain of apical membrane antigen 1                 | Purified protein           | Vicentin et al. 2014      |
|                                         |                                          |                                                                                    | MSP19                                                   | Purified protein           | Soares and Rodrigues 2002 |
|                                         |                                          |                                                                                    | PvCSP alleles (VK210, VK247, and <i>P. vivax</i> -like) | Purified protein           | Gimenez et al. 2017       |
| <i>P. berghei</i> /Malaria              |                                          | Circumsporozoite surface antigen                                                   | Yeast whole cell lysate                                 | Jacob et al. 2017          |                           |
| <i>Babesia bovis</i> /Bovine babesiosis | MSA-2a1, MSA-2b and MSA-2c               | Purified protein                                                                   | Gimenez et al. 2016                                     |                            |                           |
| <i>T. congolense</i> /Trypanosomosis    | Protease (congopain)                     | Purified protein                                                                   | Boulangé et al. 2011                                    |                            |                           |
| <i>H. polymorpha</i>                    | <i>P. falciparum</i> /Malaria            | Circumsporozoite protein                                                           | Purified protein                                        | Radosevic et al. 2010      |                           |

With this intention, scientists focused their efforts in developing a whole recombinant yeast-based vaccine as pointed out by following recent studies. For example, dead whole recombinant budding yeast expressing Rv1886c (fbpB, mpt59, Ag85B) was able to activate antigen-specific T cells and were able in reducing mycobacterial population (Grover et al. 2016). Injection of even whole *S. boulardii* was able to raise humoral immune response (Hudson et al. 2016). Administration of killed whole recombinant yeast expressing mutant KRAS shows positive response in phase II of clinical trials (Chaft et al. 2014) while in another case injecting killed recombinant yeast expressing Hepatitis B

virus protein was found safe and well tolerated in healthy subjects (Gaggar et al. 2014) and dead whole yeast was able to protect mice from pulmonary mucormycosis treated with diabetic ketoacidotic-steroid (Luo et al. 2014).

Recently it is observed that whole recombinant yeast producing RGNNV CP mount 9–27 times stronger anti-RGNNV CP IgG titers than purified RGNNV CP suggesting that whole recombinant yeast is a better and more efficient platform for antigen(s) delivery by oral immunisation (Kim et al. 2014) and heat-killed budding yeast was able to act against fungal infection (Liu et al. 2011). Many of the whole recombinant budding yeast-based

**Table 3.** Table showing list of various bacterial proteins expressed in various yeast species.

| Yeast species                                                                                                 | Source of antigen/Diseases                   | Antigen/Immunogen                                                   | Strategy                                                                                                                                                                  | References           |                     |
|---------------------------------------------------------------------------------------------------------------|----------------------------------------------|---------------------------------------------------------------------|---------------------------------------------------------------------------------------------------------------------------------------------------------------------------|----------------------|---------------------|
| <i>S. cerevisiae</i>                                                                                          | <i>A. pleuropneumoniae</i> /Pleuropneumoniae | ApxIA                                                               | Whole recombinant yeast (oral application)                                                                                                                                | Shin et al. 2003     |                     |
|                                                                                                               |                                              | ApxIIA                                                              | Purified protein                                                                                                                                                          | Shin et al. 2005     |                     |
|                                                                                                               |                                              | apxIA and apxIIA                                                    | Whole recombinant yeast (oral application)                                                                                                                                | Shin et al. 2007     |                     |
|                                                                                                               | <i>Bacillus anthracis</i> /Anthrax           | 63-kDa form of <i>Bacillus anthracis</i> protective antigen         | Purified protein                                                                                                                                                          | Robert et al. 2006   |                     |
|                                                                                                               |                                              | Rv1738, Rv2032, Rv3130, and Rv3841)                                 | Purified protein                                                                                                                                                          | King et al. 2017     |                     |
|                                                                                                               | <i>M. tuberculosis</i> /Tuberculosis         | Pore-forming protein                                                | Whole recombinant yeast                                                                                                                                                   | Walch et al. 2011    |                     |
|                                                                                                               |                                              | listeriolysin O                                                     | Purified protein                                                                                                                                                          | Romanos et al. 1991  |                     |
|                                                                                                               | <i>P. pastoris</i>                           | <i>B. pertussis</i> /Pertussis                                      | <i>Bordetella pertussis</i> pertactin (P69)                                                                                                                               | Purified protein     | Romanos et al. 1991 |
|                                                                                                               |                                              |                                                                     | Rcombinant C-terminus heavy chain fragment from botulinum neurotoxin serotype C [rBoNTC(H(c))], Rcombinant H(C) fragment of botulinum neurotoxin, serotype A (rBoNTA(HC)) | Purified protein     | Potter et al. 2000  |
|                                                                                                               |                                              | <i>C. botulinum</i> /Botulism                                       | Rcombinant H(C) fragment of botulinum neurotoxin, serotype A (rBoNTA(HC))                                                                                                 | Purified protein     | Potter et al. 1998  |
| N- and C-terminal subdomains of recombinant heavy chain fragment of <i>C. botulinum</i> neurotoxin serotype C |                                              |                                                                     | Purified protein                                                                                                                                                          | Huang et al. 2007    |                     |
| Recombinant heavy chain fragment C of botulinum neurotoxin (BoNT/E)                                           |                                              |                                                                     | Purified protein                                                                                                                                                          | Johnson et al. 2003  |                     |
| <i>M. tuberculosis</i> , Influenza A/Tuberculosis                                                             |                                              | Recombinant heavy chain fragment C of botulinum neurotoxin (BoNT/E) | Purified protein                                                                                                                                                          | Dux et al. 2006      |                     |
|                                                                                                               |                                              | Me2-HSP70 fusion protein                                            | Purified protein                                                                                                                                                          | Ebrahimi et al. 2010 |                     |
| <i>M. tuberculosis</i> /Tuberculosis                                                                          |                                              | Recombinant heparin-binding haemagglutinin                          | Purified protein                                                                                                                                                          | Kohama et al. 2008   |                     |
|                                                                                                               |                                              | <i>Leptospira interrogans</i> /Leptospirosis                        | LigANI                                                                                                                                                                    | Purified protein     | Hartwig et al. 2014 |

vaccines which are under different phases of clinical trials are revived elsewhere (Ardiani et al. 2010). Yeast cells were also able to activate OVA-specific CD4<sup>+</sup> T cells and both CD8<sup>+</sup> and CD8<sup>-</sup> DC cells were able to internalise yeast in equal amounts through dectin-1 (Backer et al. 2008). Oral administration of budding yeast expressing ApxIIA was able to mount an immune response against *A. pleuropneumoniae* (Shin et al. 2005, 2013) and recombinant yeast was also able to activate HBV X, S, and core-specific T cells and viral clearance (King et al. 2014). Thus, ample evidence is mentioned that showed the merits of using the whole recombinant yeast-based vaccines.

## YEAST DISPLAY FOR VACCINES

Use of whole recombinant yeast expressing the immunogenic protein(s) from pathogenic species is an important and novel strategy. Still, yeast display (YD) or yeast surface display (YSD)

appears more important and allows development of oral or edible vaccines. As a proof of concept, many recent reports showed the encouraging results where yeast display being used as a prophylactic vaccine. For example, an oral vaccine against candidiasis was introduced using molecular display systems with *S. cerevisiae* (Shibasaki and Ueda 2016). Identification of anti-B7-H4 antibodies using yeast-display library of recombinant antibodies derived from ovarian cancer patients was able to restore antitumor T cell responses (Dangaj and Scholler 2015). In another case, envelope protein E2 of bovine viral diarrhoea virus (BVDV) displayed on budding yeast surface was able to stimulate the production of CXCL-8 in macrophages. The same study also showed that the particulate nature of yeast is also important in efficient stimulation of T cells (Patterson et al. 2012). Feeding of freeze-dried budding yeast particles expressing the PCV2b Cap protein on their surface provides protection against PCV2b challenge in pigs (Patterson et al. 2015). Although yeast display is in its infancy stage and requires further research, some of the studies already

**Table 4.** List of nematode and tick proteins expressed in yeast.

| Yeast species      | Source of antigen/Diseases                                                              | Antigen/Immunogen                             | Strategy         | References                                   |
|--------------------|-----------------------------------------------------------------------------------------|-----------------------------------------------|------------------|----------------------------------------------|
| <i>P. pastoris</i> | <i>Schistosoma mansoni</i> /Intestinal schistosomiasis                                  | Tetraspanin surface antigen protein (Sm-TPS2) | Purified protein | Cheng et al. 2013                            |
|                    | <i>Necator americanus</i> /Intestinal schistosomiasis                                   | Sm14 antigen                                  | Purified protein | Damasceno et al. 2017                        |
|                    |                                                                                         | Glutathione S-transferase 1 (Na-GST-1)        | Purified protein | Curti et al. 2014                            |
|                    | <i>Boophilus microplus</i> /Important in livestock diseases                             | Glutathione S-transferase 1 (Na-GST-1)        | Purified protein | Plieskatt et al. 2012                        |
|                    |                                                                                         | Glutathione S-transferase 1 (Na-GST-1)        | Purified protein | Zhan et al. 2010                             |
|                    | <i>Ascaris suum</i> /Ascariasis in pigs                                                 | Bm86 protein                                  | Purified protein | García-García et al. 1998                    |
|                    |                                                                                         | As16 protein                                  | Purified protein | García-García et al. 2000<br>Wei et al. 2017 |
|                    | <i>Ancylostoma caninum</i> /Intestinal related infection in dogs                        | Aspartyl protease inhibitor (API-1)           | Purified protein | Delaney et al. 2005                          |
|                    | <i>Ancylostoma ceylanicum</i> /Intestinal related infection in mammals including humans | Aspartyl protease inhibitor (API-1)           | Purified protein | Delaney et al. 2005                          |

**Table 5.** List of tumour associated antigens expressed in yeast.

| Yeast species        | Antigen/Immunogen                                                      | Tumour type                                 | Strategy                | Clinical phase          | Reference            |
|----------------------|------------------------------------------------------------------------|---------------------------------------------|-------------------------|-------------------------|----------------------|
| <i>S. cerevisiae</i> | Brachyury (GI-6301)                                                    | Advanced malignant solid Tumours (chordoma) | Whole recombinant yeast | Phase-I                 | Heery et al. 2015    |
|                      | Brachyury (GI-6301)                                                    | Epithelial-mesenchyma                       | Whole recombinant yeast | Phase-I                 | Hamilton et al. 2013 |
|                      | Cancer testis antigen NY-ESO-1                                         | Melanoma                                    | Yeast surface display   | Phase-I                 | Mischo et al. 2011   |
|                      | Human MART-1                                                           | Melanoma                                    | Whole recombinant yeast | *Preclinical            | Riemann et al. 2007  |
|                      | Derived Granulocyte-Macrophage Colony-Stimulating Factor (GM-CSF)      | Melanoma                                    | Purified protein        | Phase-III               | Lawson et al. 2015   |
|                      | KRAS                                                                   | Lung adenocarcinoma                         | Whole recombinant yeast | Phase-II                | Chaft et al. 2014    |
|                      | CEA                                                                    | Carcinoma                                   | Whole recombinant yeast | Phase-I                 | Bilusic et al. 2014  |
|                      | Human MART-1 (hMART-IT)                                                | Melanoma                                    | Whole recombinant yeast | *Preclinical            | Tanaka et al. 2011   |
|                      | BCR-ABL <sup>T315I</sup>                                               | Leukemias                                   | Whole recombinant yeast | *Preclinical            | Bui et al. 2010      |
|                      | Single chain chimeric peptide composed of hCG $\beta$ and oLH $\alpha$ | NA                                          | Purified protein        | *Preclinical            | Jiang et al. 2010    |
|                      | Human CEA (yeast-CEA)                                                  | NA                                          | Whole recombinant yeast | *Preclinical            | Wansley et al. 2008  |
|                      | NY-ESO-1-Aga2p                                                         | NA                                          | Purified protein        | *Preclinical            | Wadle et al. 2010    |
|                      | <i>P. pastoris</i>                                                     | HPV16 L1 antigen                            | Papilloma               | Whole recombinant yeast | *Preclinical         |

\*Preclinical indicate that experiments were performed in model organisms and not in any human subjects.

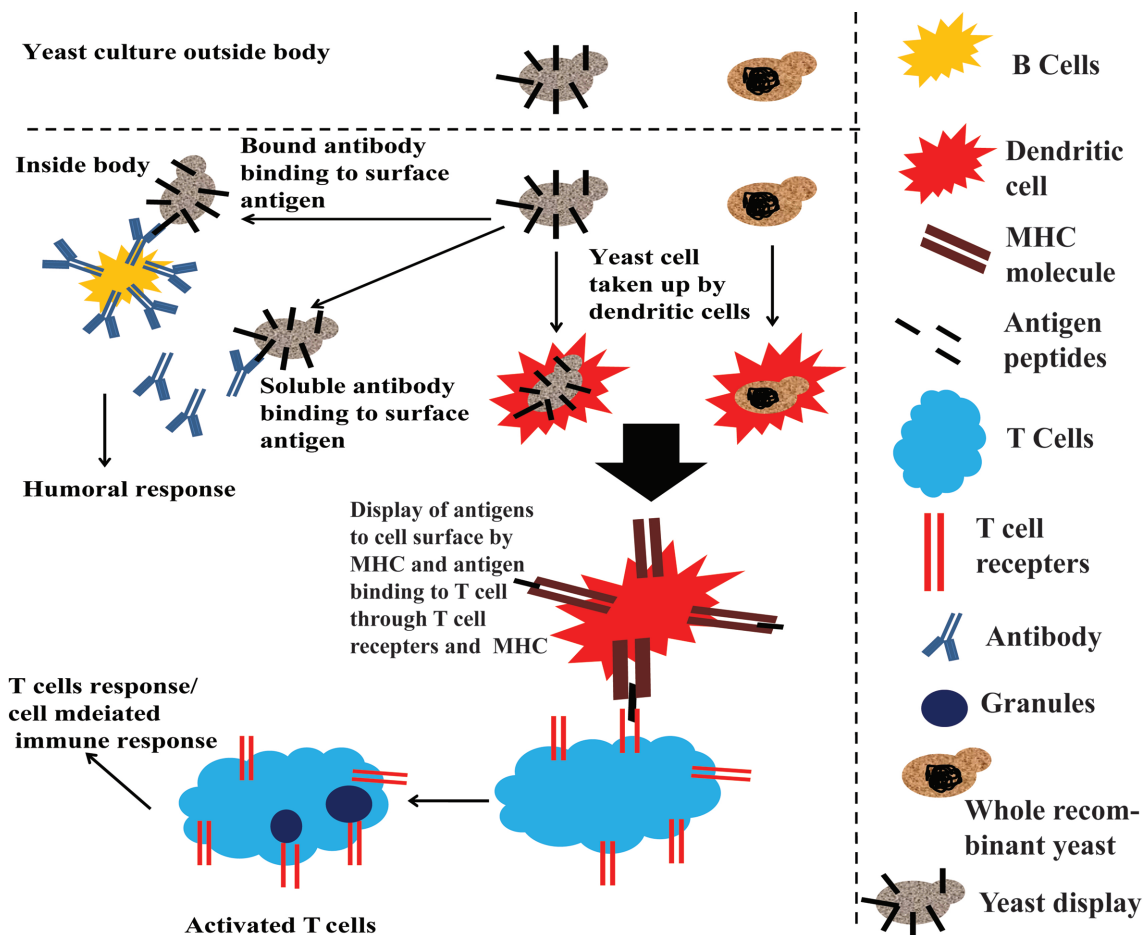

Figure 2. Schematic showing suitability of whole yeast and yeast display in generating an immune response. Note as a proof of concept, the detailed mechanism of induction and interaction of humoral and cell-mediated immune response is not shown in the figure.

highlighted in this article clearly showed the impact this technology may have on vaccine development and application.

### YEAST-DERIVED VLPs (VIRUS-LIKE PARTICLES) AS VACCINES

Although purified protein antigen proved to be of high value in inducing a protective immune response and as a result, several protein immunogens expressed and purified from yeast have already reached clinical trials. But limitations associated with purified protein including their low immunogenicity (due to lack of particulate nature), small size, rapid body clearance means an alternative need to be looked which can overcome the issues highlighted above (Purcell, McCluskey and Rossjohn 2007; Aguilar and Rodríguez 2007). This led to the development of VLPs which resembles like a virus but lack viral genome. Use of these self-assembled protein complexes as vaccines proved to be much superior compared to purified protein immunogens. Because of their particulate nature VLPs can raise both B and T cell immune responses (Akahata et al. 2010). VLPs can provide a safer alternative to attenuated viruses. VLPs were used to develop FDA-approved vaccines for Hepatitis B and human papillomavirus (Zhang et al. 2015b). This strategy allows expressed protein antigens to assemble into VLPs (Kingsman et al. 1995), and involves fusion of protein or antigen of interest with yeast Ty retrotransposon. The chimeric fusion protein can self-assemble like virus particles without compromising their

immunogenic nature. Apart from that the p1 and Gag 1 protein of *S. cerevisiae* transposon Ty1 can be used for the construction of bi-functional VLPs (Marchenko et al. 2003; Powilleit, Breinig and Schmitt 2007). List of protein antigens that were expressed in yeast to produce VLPs is shown in Tables 1-3. The detailed account of VLPs fall outside the scope of present review and same can found elsewhere (Roldao et al. 2010; Mohsen et al. 2017).

### YEAST CELL WALL COMPONENT AS AN IMMUNE MODULATOR

Immunogenic or inherent adjuvant nature of yeast cells is attributed to its cell wall components. Initially, it was believed that polysaccharides, particularly glucans of cell wall act as a natural adjuvant and this generalisation is well supported by several studies that showed that BGs acts as an immune stimulant or modulator (Pillemer and Ecker 1941; Chihara et al. 1969) and BGs were also known for their protective role against microbial infection and cancer (Brown and Gordon 2003; Borchers et al. 1999). Detail account of BGs and description of their immune modulatory nature is beyond limits of present review and can be found elsewhere (Vetvicka 2011). Suffice to say that carbohydrates or polysaccharides components, example glucans confer important natural adjuvant nature to yeast cells that are proving highly valuable in using whole yeast or yeast display as an important strategy in developing yeast-based vaccines. An example, BGs was able to induce production of cytokines and

NFκB in BMDM cells (Walachowski, Tabouret and Foucras 2016). A recent study shows that β-(1→6)-glucans was completely phagocytosed by DCs and helps in mounting immune response against fungal response (Noss et al. 2015) and oral administration of BGs was able in clearance of Hepatitis B virus in a mouse model (Yu et al. 2015). BGs were also found to activate and enhances CTL responses through the PI3K pathway (Ding et al. 2015) and were also able to provide protection from systemic aspergillosis (Clemons et al. 2014). BGs from budding yeast were able to induce the expression of several cytokines (IL-10, TGF-β1 and IL-2) and a tolerogenic enzyme (IDO) in bone marrow-derived DCs as well as spleen cells (Karumuthil-Meilethil et al. 2014). These studies clearly showed that BGs of yeast cell wall act as important stimulators and modulators of immune response that have definite and important implication in vaccine development and application.

## CONCLUDING REMARK

During last two decades more than 500 publications appeared (PubMed: <http://www.ncbi.nlm.nih.gov/pubmed>) in which yeasts were used for the expression of heterologous proteins to raise an immune response against different pathogenic species and tumour (Jung et al. 2010) and the pace with which information is gathering in this emerging field make it difficult to compile all the work together and can be found elsewhere (Ardiani et al. 2010; Shin and Yoo 2013). Out of so many yeast species mentioned in this review, *S. cerevisiae* and *P. pastoris* emerge as a most promising candidates for expression of heterologous proteins for vaccines development. Apart from non-pathogenic and inherent adjuvant nature, the ability of proteins expressed in yeast to raise an immune response and further development of whole recombinant or yeast display strategies qualify them for the expression of the heterologous protein for development of oral or edible vaccines. These novel strategies of using whole recombinant or yeast display provide numerous benefits in vaccine development including cutting down the cost associated with protein purification, increased stability of antigens in cellular environment compared to purified proteins in a buffer, unlike peptide-based vaccines whole recombinant yeast-based vaccines does not require special adjuvant, ease, and economics associated with mass culture of recombinant yeast compared to other systems like mammalian cells or plant system makes yeasts a model of choice for vaccine development. Although numerous studies are available, which showed the importance and benefits of application of YD or WRY as a vaccine; only a few studies are available that investigate the stability of expressed heterologous protein antigen in WRY. For example, it is recently shown that in stationary phase yeast cells, expressed protein antigen or immunogen remains stable for up to a year when stored at 2–8°C and at 23–25°C (Kumar 2018). While another study investigates the stability of protein antigen in WRY over a period of six months (Wang et al. 2018d).

The yeast display strategy helps in the quick and fast recognition of pathogen antigens and particulate nature of yeast (whole recombinant yeast and yeast display-based vaccines) helps in the engulfment of whole cells whose components are then displayed on the surface of APCs, which help in activation of T cells through interaction and recognition of antigen peptides through MHC molecules. Activation of T cells is important for a cell-mediated immune response, in mounting the full humoral response and for a secondary immune response. Apart from that yeast display also provide an opportunity that antigen on yeast

cells can be directly recognised by soluble antibodies in blood or bound to B cell surface. Suitability of whole recombinant and yeast display in the activation of an immune response is shown in Fig. 2.

It is also interesting that the yeast-based vaccines are also able to modulate tumour growth and developments in this field are encouraging that provide required and necessary imputes for further studies. The ability of cell wall components, including beta-glucan (BG) to activate macrophages and APCs, or DCs may be important in checking fungal infection due to the conserved nature of cell wall components across fungal species.

The fact that many yeasts-based vaccines are under different phases of clinical trials and many of them reached to the third phase of clinical trials showed clear merits associated with these vaccines and use of protein purified protein from yeast as a peptide vaccine against hepatitis B is an important success story of a yeast-based vaccine. Thus, in the end, it can be concluded that further identification of more protein antigens, their expression in yeast and the use of whole recombinant or yeast display will certainly prove instrumental in cutting time and cost involved in vaccine preparation. These yeasts-based vaccines will be of great value in vaccine development, particularly in those cases where the mass culture of associated pathogens is still not feasible, example leprosy, malaria. Thus, yeast-based vaccines provide a ray of hope for both in public health and for farm animals, and we can hope that in near future yeast-based edible or oral vaccine may be common on shelves in medical dispensaries or clinical stores.

## ACKNOWLEDGEMENT

We feel regret for not being able to refer to the work of everyone in the field. I am thankful to the University of California San Diego (UCSD), San Diego, CA, for providing me with space and other necessary facilities for completion of this manuscript. I am equally thankful to reviewers and the editorial team for their critical and constructive suggestions which certainly improve the present manuscript.

**Conflict of interest.** None declared.

**Ethical approval:** This article does not contain any studies with human participants or animals performed by any of the authors.

## REFERENCES

- Acosta-Rivero N, Aguilar JC, Musacchio A et al. Characterization of the HCV core virus-like particles produced in the methylotrophic yeast *Pichia pastoris*. *Biochem Biophys Res Commun* 2001;287:122–5.
- Aguilar JC, Rodríguez EG. Vaccine adjuvants revisited. *Vaccine* 2007;25:3752–62.
- Ahmad E, Fatima MT, Saleemuddin M et al. Plasma beads loaded with *Candida albicans* cytosolic proteins impart protection against the fungal infection in BALB/c mice. *Vaccine* 2012;30:6851–58.
- Akahata W, Yang ZY, Andersen H et al. A virus-like particle vaccine for epidemic Chikungunya virus protects nonhuman primates against infection. *Nat Med* 2010;16:334–8.
- Ardiani A, Higgins JP, Hodge JW. Vaccines based on whole recombinant *Saccharomyces cerevisiae* cells. *FEMS Yeast Res* 2010;10:1060–9.

- Arnold M, Durairaj V, Mundt E et al. Protective vaccination against infectious bursal disease virus with whole recombinant *Kluyveromyces lactis* yeast expressing the viral VP2 subunit. *PLoS One* 2012;7:e42870.
- Arnot DE, Cavanagh DR, Remarque EJ et al. Comparative testing of six antigen-based malaria vaccine candidates directed toward merozoite-stage *Plasmodium falciparum*. *Clin Vaccine Immunol* 2008;15:1345–55.
- Arora U, Tyagi P, Swaminathan S et al. Virus-like particles displaying envelope domain III of dengue virus type 2 induce virus-specific antibody response in mice. *Vaccine* 2013;31:873–8.
- Assis-Marques MA, Oliveira AF, Ruas LP et al. *Saccharomyces cerevisiae* expressing Gp43 protects mice against *Paracoccidioides brasiliensis* infection. *PLoS One* 2015;10:e0120201.
- Athmaram TN, Saraswat S, Santhosh SR et al. Yeast expressed recombinant Hemagglutinin protein of novel H1N1 elicits neutralising antibodies in rabbits and mice. *Virology* 2011;8:524.
- Athmaram TN, Singh AK, Saraswat S et al. A simple *Pichia pastoris* fermentation and downstream processing strategy for making recombinant pandemic Swine Origin Influenza A virus Hemagglutinin protein. *J Ind Microbiol Biotechnol* 2013;40:245–55.
- Backer R, van Leeuwen F, Kraal G et al. CD8- dendritic cells preferentially cross-present *Saccharomyces cerevisiae* antigens. *Eur J Immunol* 2008;38:370–80.
- Bathurst IC, Gibson HL, Kansopon J et al. An experimental vaccine cocktail for *Plasmodium falciparum* malaria. *Vaccine* 1993;11:449–56.
- Bernstein MB, Chakraborty M, Wansley EK et al. Recombinant *Saccharomyces cerevisiae* (yeast-CEA) as a potent activator of murine dendritic cells. *Vaccine* 2008;26:509–21.
- Bilusic M, Heery CR, Arlen PM et al. Phase I trial of a recombinant yeast-CEA vaccine (GI-6207) in adults with metastatic CEA-expressing carcinoma. *Cancer Immunol Immunother* 2014;63:225–34.
- Bisht H, Chugh DA, Raje M et al. Recombinant dengue virus type 2 envelope/hepatitis B surface antigen hybrid protein expressed in *Pichia pastoris* can function as a bivalent immunogen. *J Biotechnol* 2002;99:97–110.
- Blanquet S, Antonelli R, Laforet L et al. Living recombinant *Saccharomyces cerevisiae* secreting proteins or peptides as a new drug delivery system in the gut. *J Biotechnol* 2004;110:37–49.
- Bolhassani A, Muller M, Roohvand F et al. Whole recombinant *Pichia pastoris* expressing HPV16 L1 antigen is superior in inducing protection against tumour growth as compared to killed transgenic *Leishmania*. *Hum Vaccine Immunotherapeutics* 2014;10:3499–508.
- Borchers AT, Stern JS, Hackman RM et al. Mushrooms, tumours, and immunity. *Proc Soc Exp Biol Med* 1999;221:281–93.
- Boulangé AF, Khamadi SA, Pillay D et al. Production of congopain, the major cysteine protease of *Trypanosoma* (*Nannomonas*) *congolense*, in *Pichia pastoris* reveals unexpected dimerisation at physiological pH. *Protein Expression Purif* 2011;75:95–103.
- Brady CP, Shimp RL, Miles AP et al. High-level production and purification of P30P2MSP1(19), an important vaccine antigen for malaria, expressed in the methylotropic yeast *Pichia pastoris*. *Protein Expr Purif* 2001;23:468–75.
- Bredell H, Smith JJ, Görgens JF et al. Expression of unique chimeric human papilloma virus type 16 (HPV-16) L1-L2 proteins in *Pichia pastoris* and *Hansenula polymorpha*. *Yeast* 2018;35:519–29.
- Broach JR, Pringle JR, Jones EW. *The Molecular and Cellular Biology of the Yeast Saccharomyces*. Cold Spring Harbor, NY: Cold Spring Harbor Laboratory Press, 1991.
- Brown DR, Bryan JT, Schroeder JM et al. Neutralization of human papillomavirus type 11 (HPV-11) by serum from women vaccinated with yeast-derived HPV-11 L1 virus-like particles: correlation with competitive radioimmunoassay titer. *J Infect Dis* 2001;184:1183–6.
- Brown GD, Gordon S. Fungal beta-glucans and mammalian immunity. *Immunity* 2003;19:311–15.
- Bui MR, Hodson V, King T et al. Mutation-specific control of BCR-ABL T315I positive leukemia with a recombinant yeast-based therapeutic vaccine in a murine model. *Vaccine* 2010;28:6028–35.
- Caetano KA, Del-Rios NH, Pinheiro RS et al. Low immunogenicity of recombinant Hepatitis B vaccine derived from *Hansenula polymorpha* in adults aged over 40 years. *Am J Trop Med Hyg* 2017;96:118–21.
- Capilla J, Clemons KV, Liu M et al. *Saccharomyces cerevisiae* as a vaccine against coccidioidomycosis. *Vaccine* 2009;27:3662–68.
- Chaft JE, Litvak A, Arcila ME et al. Phase II study of the GI-4000 KRAS vaccine after curative therapy in patients with stage I-III lung adenocarcinoma harboring a KRAS G12C, G12D, or G12V mutation. *Clin Lung Cancer* 2014;15:405–10.
- Chandramouli S, Medina-Selby A, Coit D et al. Generation of a parvovirus B19 vaccine candidate. *Vaccine* 2013;31:3872–8.
- Chang SP, Gibson HL, Lee-Ng CT et al. A carboxyl-terminal fragment of *Plasmodium falciparum* gp195 expressed by a recombinant baculovirus induces antibodies that completely inhibit parasite growth. *J Immunol* 1992;149:548–55.
- Chen D, Kristensen D. Opportunities and challenges of developing thermostable vaccines. *Expert Rev Vaccines* 2009;8:547–57.
- Chen X, Fernando GJP, Crichton ML et al. Improving the reach of vaccines to low-resource regions, with a needle-free vaccine delivery device and long-term thermos stabilization. *J Control Release* 2011;152:349–55.
- Cheng CY, Wu CW, Lin GJ et al. Enhancing expression of the classical swine fever virus glycoprotein E2 in yeast and its application to a blocking ELISA. *J Biotechnol* 2014;174:1–6.
- Cheng W, Curti E, Rezende WC et al. Biophysical and formulation studies of the *Schistosoma mansoni* TSP-2 extracellular domain recombinant protein, a lead vaccine candidate antigen for intestinal schistosomiasis. *Hum Vaccine Immunotherapeutics* 2013;9:2351–61.
- Chihara G, Maeda Y, Hamuro J et al. Inhibition of mouse sarcoma 180 by polysaccharides from *Lentinus edodes* (Berk.) sing. *Nature* 1969;222:687–688.
- Cho SY, Kim HJ, Lan NT et al. Oral vaccination through voluntary consumption of the convict grouper *Epinephelus septemfasciatus* with yeast producing the capsid protein of red-spotted grouper nervous necrosis virus. *Vet Microbiol* 2017;204:159–64.
- Choi YR, Kim HJ, Lee JY et al. Chromatographically-purified capsid proteins of red-spotted grouper nervous necrosis virus expressed in *Saccharomyces cerevisiae* form virus-like particles. *Protein Expression Purif* 2013;89:162–8.
- Cino J. High-yield protein production from *Pichia pastoris* yeast: a protocol for benchtop fermentation. *Am Biotechnol Lab* 1999;17:10–21.
- Clemons KV, Danielson ME, Michel KS et al. Whole glucan particles as a vaccine against murine aspergillosis. *J Med Microbiol* 2014;63:1750–9.

- Coimbra EC, Gomes FB, Campos JF et al. Production of L1 protein from different types of HPV in *Pichia pastoris* using an integrative vector. *Braz J Med Biol Res* 2011;**44**:1209–14.
- Collins WE, Nussenzweig RS, Ballou WR et al. Immunization of *Saimiri sciureus boliviensis* with recombinant vaccines based on the circumsporozoite protein of *Plasmodium vivax*. *Am J Trop Med Hyg* 1989;**40**:455–64.
- Cregg JM, Tschoopp JF, Stillman C et al. High-level expression and efficient assembly of hepatitis-B surface-antigen in the methylotrophic yeast, *Pichia-pastoris*. *Nat Biotechnol* 1987;**5**:479–85.
- Curti E, Seid CA, Hudspeth E et al. Optimization and revisions of the production process of the Necator americanus glutathione S-transferase 1 (Na-GST-1), the lead hookworm vaccine recombinant protein candidate. *Hum Vaccine Immunotherapeutics* 2014;**10**:1914–25.
- Damasceno L, Ritter G, Batt CA. Process development for production and purification of the *Schistosoma mansoni* Sm14 antigen. *Protein Expression Purif* 2017;**134**:72–81.
- Dangaj D, Scholler N. Isolation and validation of Anti-B7-H4 scFvs from an ovarian cancer scFv yeast-display library. *Methods Mol Biol* 2015;**1319**:37–49.
- Darby RA, Cartwright SP, Dilworth MV et al. Which yeast species shall I choose? *Saccharomyces cerevisiae* versus *Pichia pastoris* (review). *Methods Mol Biol* 2012;**866**:11–23.
- Dargeviciute A, Brus Sjölander K, Sasnauskas K et al. Yeast-expressed *Puumala hantavirus* nucleocapsid protein induces protection in a bank vole model. *Vaccine* 2002;**20**:3523–31.
- Darroch CJ, Christmas SE, Barnes RM. In vitro human lymphocyte proliferative responses to a glycoprotein of the yeast *Saccharomyces cerevisiae*. *Immunology* 1994;**81**:247–52.
- Das P. Revolutionary vaccine technology breaks the cold chain. *Lancet Infect Dis* 2004;**4**:719
- Davies J. Inactivation of antibiotics and the dissemination of resistance genes. *Science* 1994;**264**:375–82.
- Delaney A, Williamson A, Brand A et al. Cloning and characterisation of an aspartyl protease inhibitor (API-1) from *Ancylostoma hookworms*. *Int J Parasitol* 2005;**35**:303–13.
- Ding J, Feng T, Ning Y et al.  $\beta$ -Glucan enhances cytotoxic T lymphocyte responses by activation of human monocyte-derived dendritic cells via the PI3K/AKT pathway. *Hum Immunol* 2015;**76**:146–54.
- Duffy PE, Pimenta P, Kaslow DC. Pgs28 belongs to a family of epidermal growth factor-like antigens that are targets of malaria transmission-blocking antibodies. *J Exp Med* 1993;**177**:505–10.
- Dux MP, Barent R, Sinha J et al. Purification and scale-up of a recombinant heavy chain fragment C of botulinum neurotoxin serotype E in *Pichia pastoris* GS115. *Protein Expression Purif* 2006;**45**:359–67.
- Dux MP, Huang J, Barent R et al. Purification of a recombinant heavy chain fragment C vaccine candidate against botulinum serotype C neurotoxin (rBoNTC(H(c))) expressed in *Pichia pastoris*. *Protein Expression Purif* 2011;**75**:177–85.
- Ebrahimi SM, Tebianian M, Toghiani H et al. Cloning, expression and purification of the influenza A (H9N2) virus M2e antigen and truncated *Mycobacterium tuberculosis* HSP70 as a fusion protein in *Pichia pastoris*. *Protein Expression Purif* 2010;**70**:7–12.
- Etemad B, Batra G, Raut R et al. An envelope domain III-based chimeric antigen produced in *Pichia pastoris* elicits neutralizing antibodies against all four dengue virus serotypes. *Am J Trop Med Hyg* 2008;**79**:353–63.
- Faber BW, Remarque EJ, Morgan WD et al. Malaria vaccine-related benefits of a single protein comprising *Plasmodium falciparum* apical membrane antigen 1 domains I and II fused to a modified form of the 19-kilodalton C-terminal fragment of merozoite surface protein 1. *Infect Immun* 2007;**75**:5947–55.
- Fang Y, Liu MQ, Chen L et al. Rabies post-exposure prophylaxis for a child with severe allergic reaction to rabies vaccine. *Hum Vaccin Immunother* 2016;**12**:1802–04.
- Fazlalipour M, Keyvani H, Monavari SH et al. Expression, purification and immunogenic description of a hepatitis C virus recombinant CoreE1E2 protein expressed by yeast *Pichia pastoris*. *Jundishapur J Microbiol* 2015;**8**:e17157.
- Cox FE. Malaria vaccines-progress and problems. *Trends Biotechnol* 1991;**9**:389–94.
- Franzusoff A, Duke RC, King TH et al. Yeasts encoding tumour antigens in cancer immunotherapy. *Expert Opin Biol Ther* 2005;**5**:565–75.
- Freivalds J, Dislers A, Ose V et al. Highly efficient production of phosphorylated hepatitis B core particles in yeast *Pichia pastoris*. *Protein Expression Purif* 2011;**75**:218–24.
- Gaggar A, Coeshott C, Apelian D et al. Safety, tolerability and immunogenicity of GS-4774, a hepatitis B virus-specific therapeutic vaccine, in healthy subjects: a randomized study. *Vaccine* 2014;**32**:4925–31.
- Gantner BN, Simmons RM, Canavera SJ et al. Collaborative induction of inflammatory responses by dectin-1 and Toll-like receptor 2. *J Exp Med* 2003;**197**:1107–17.
- García-García JC, Montero C, Redondo M et al. Control of ticks resistant to immunization with Bm86 in cattle vaccinated with the recombinant antigen Bm95 isolated from the cattle tick, *Boophilus microplus*. *Vaccine* 2000;**18**:2275–87.
- García-García JC, Soto A, Nigro F et al. Adjuvant and immunostimulating properties of the recombinant Bm86 protein expressed in *Pichia pastoris*. *Vaccine* 1998;**16**:1053–55.
- Gedvilaite A, Frömmel C, Sasnauskas K et al. Formation of immunogenic virus-like particles by inserting epitopes into surface-exposed regions of hamster polyomavirus major capsid protein. *Virology* 2000;**273**:21–35.
- Gellissen G, Hollenberg CP. Application of yeasts in gene expression studies: a comparison of *Saccharomyces cerevisiae*, *Hansenula polymorpha* and *Kluyveromyces lactis* – a review. *Gene* 1997;**190**:87–97.
- Gellissen G, Melber K, Janowicz ZA et al. Heterologous protein production in yeast. *Antonie Van Leeuwenhoek* 1992a;**62**:79–93.
- Gellissen G, Weydemann U, Strasser AW et al. Progress in developing methylotrophic yeasts as expression systems. *Trends Biotechnol* 1992b;**10**:413–7.
- Gerstmayer B, Altenschmidt U, Hoffmann M et al. Costimulation of T cell proliferation by a chimeric B7-2 antibody fusion protein specifically targeted to cells expressing the erbB2 proto-oncogene. *J Immunol* 1997;**158**:4584–90.
- Gilbert SC, Plebanski M, Harris SJ et al. A protein particle vaccine containing multiple malaria epitopes. *Nat Biotechnol* 1997;**15**:1280–84.
- Gimenez AM, Françoso KS, Ersching J et al. A recombinant multi-antigen vaccine formulation containing *Babesia bovis* merozoite surface antigens MSA-2a<sub>1</sub>, MSA-2b and MSA-2c elicits invasion-inhibitory antibodies and IFN- $\gamma$  producing cells. *Parasites Vectors* 2016;**9**:577.
- Gimenez AM, Lima LC, Françoso KS et al. Vaccine containing the three allelic variants of the *Plasmodium vivax* circumsporozoite antigen induces protection in mice after challenge with a transgenic rodent malaria parasite. *Front Immunol* 2017;**8**:1275.



- Vieira Gomes AM, Souza Carmo T, Silva Carvalho L et al. Comparison of yeasts as hosts for recombinant protein production. *Microorganisms* 2018;**6**:38.
- Gozar MM, Price VL, Kaslow DC. *Saccharomyces cerevisiae*-secreted fusion proteins Pfs25 and Pfs28 elicit potent *Plasmodium falciparum* transmission-blocking antibodies in mice. *Infect Immun* 1998;**66**:59–64.
- Grover A, McLean JL, Troudt JM et al. Heat killed *Saccharomyces cerevisiae* as an adjuvant for the induction of vaccine-mediated immunity against infection with *Mycobacterium tuberculosis*. *Vaccine* 2016;**34**:2798–05.
- Gupta G, Glueck R, Rishi N. Physicochemical characterization and immunological properties of *Pichia pastoris* based HPV16L1 and 18L1 virus like particles. *Biologicals* 2017;**46**:11–22.
- Gurramkonda C, Adnan A, Gäbel T et al. Simple high-cell density fed-batch technique for high-level recombinant protein production with *Pichia pastoris*: Application to intracellular production of Hepatitis B surface antigen. *Microb Cell Fact* 2009;**8**:13.
- Hadiji-Abbes N, Martin M, Benzina W et al. Extraction and purification of hepatitis B virus-like M particles from a recombinant *Saccharomyces cerevisiae* strain using alumina powder. *J Virol Methods* 2013;**187**:132–7.
- Haller AA, Lauer GM, King TH et al. Whole recombinant yeast-based immunotherapy induces potent T cell responses targeting HCV NS3 and core proteins. *Vaccine* 2007;**25**:1452–63.
- Hamilton DH, Litzinger MT, Jales A et al. Immunological targeting of tumour cells undergoing an epithelial-mesenchymal transition via a recombinant brachyury-yeast vaccine. *Oncotarget* 2013;**4**:1777–90.
- Hanumantha Rao N, Baji Babu P, Rajendra L et al. Expression of codon optimized major capsid protein (L1) of human papillomavirus type 16 and 18 in *Pichia pastoris*; purification and characterization of the virus-like particles. *Vaccine* 2011;**29**:7326–34.
- Hardy E, Martínez E, Diago D et al. Large-scale production of recombinant hepatitis B surface antigen from *Pichia pastoris*. *J Biotechnol* 2000;**77**:157–67.
- Hartwig DD, Bacelo KL, de Oliveira PD et al. Mannosylated Lig-ANI produced in *Pichia pastoris* protects hamsters against leptospirosis. *Curr Microbiol* 2014;**68**:524–30.
- Hauser P, Voet P, Simoen E et al. Immunological properties of recombinant HBsAg produced in yeast. *Postgrad Med J* 1987;**63**:83–91.
- He F, Joshi SB, Bosman F et al. Structural stability of hepatitis C virus envelope glycoprotein E1: effect of pH and dissociative detergents. *J Pharm Sci* 2009;**98**:3340–57.
- Heery CR, Singh BH, Rauckhorst M et al. Phase I trial of a yeast-based therapeutic cancer vaccine (GI-6301) targeting the transcription factor brachyury. *Cancer Immunol Res* 2015;**3**:1248–56.
- Heintel T, Breinig F, Schmitt MJ et al. Extensive MHC class I-restricted CD8 T lymphocyte responses against various yeast genera in humans. *FEMS Immunol Med Microbiol* 2003;**39**:279–86.
- Hirunpetcharat C, Stanisic D, Liu XQ et al. Intranasal immunization with yeast-expressed 19 kD carboxyl-terminal fragment of *Plasmodium yoelii* merozoite surface protein-1 (yMSP119) induces protective immunity to blood stage malaria infection in mice. *Parasite Immunol* 2003;**20**:413–20.
- Hisaeda H, Saul A, Reece JJ et al. Merozoite surface protein 3 and protection against malaria in *Aotus nancymai* monkeys. *J Infect Dis* 2002;**185**:657–64.
- Hohmann S. A region in the yeast genome which favours multiple integration of DNA via homologous recombination. *Curr Genet* 1987;**12**:519–26.
- Huang J, Barent R, Inan M et al. Purification of the N- and C-terminal subdomains of recombinant heavy chain fragment C of botulinum neurotoxin serotype C. *Methods Mol Biol* 2007;**389**:77–98.
- Hudson LE, McDermott CD, Stewart TP et al. Characterization of the probiotic yeast *Saccharomyces boulardii* in the healthy mucosal immune system. *PLoS One* 2016;**11**:e0153351.
- Ikeda Y, Adachi Y, Ishibashi K et al. Activation of toll-like receptor-mediated NF-kappa beta by zymosan-derived water-soluble fraction: possible contribution of endotoxin-like substances. *Immunopharmacol Immunotoxicol* 2005;**27**:285–98.
- Jacob D, Ruffie C, Combredet C et al. Yeast lysates carrying the nucleoprotein from measles virus vaccine as a novel subunit vaccine platform to deliver *Plasmodium circumsporozoite* antigen. *Malar J* 2017;**16**:259.
- Jacobs E, Rutgers T, Voet P et al. Simultaneous synthesis and assembly of various hepatitis B surface proteins in *Saccharomyces cerevisiae*. *Gene* 1989;**80**:279–91.
- Jansen KU, Rosolowsky M, Schultz LD et al. Vaccination with yeast-expressed cottontail rabbit papillomavirus (CRPV) virus-like particles protects rabbits from CRPV-induced papilloma formation. *Vaccine* 1995;**13**:1509–14.
- Jiang C, Jiang Y, Huang Z et al. Evaluation of the immunogenicity of a single chain chimeric peptide composed of hCG $\beta$  and oLH $\alpha$  for inhibition of the growth of hCG $\beta$ -expressing cancer cells. *Cancer Immunol Immunother* 2010;**59**:1771–9.
- Jiang Z, Tong G, Cai B et al. Purification and immunogenicity study of human papillomavirus 58 virus-like particles expressed in *Pichia pastoris*. *Protein Expr Purif* 2011;**80**:203–10.
- Jing W, Zhou J, Wang C et al. Preparation of the secretory recombinant ALV-J gp85 protein using *Pichia pastoris* and its immunoprotection as vaccine antigen combining with CpG-ODN adjuvant. *Viral Immunol* 2018;**31**:407–16.
- Johnson SK, Zhang W, Smith LA et al. Scale-up of the fermentation and purification of the recombinant heavy chain fragment C of botulinum neurotoxin serotype F, expressed in *Pichia pastoris*. *Protein Expression Purif* 2003;**32**:1–9.
- Jung V, Fischer E, Imig J et al. Yeast-based identification of prostate tumour antigens provides an effective vaccine platform. *Anticancer Res* 2010;**30**:895–902.
- Karumuthil-Melethil S, Gudi R, Johnson BM et al. Fungal  $\beta$ -glucan, a Dectin-1 ligand, promotes protection from type 1 diabetes by inducing regulatory innate immune response. *J Immunol* 2014;**193**:3308–21.
- Kaslow DC, Shiloach J. Production, purification and immunogenicity of a malaria transmission-blocking vaccine candidate: TBV25H expressed in yeast and purified using nickel-NTA agarose. *Biotechnology (N Y)* 1994;**12**:494–9.
- Kee GS, Pujar NS, Titchener-Hooker NJ. Study of detergent-mediated liberation of hepatitis B virus-like particles from *S. cerevisiae* homogenate: Identifying a framework for the design of future-generation lipoprotein vaccine processes. *Biotechnol Progr* 2008;**24**:623–31.
- Khetarpal N, Shukla R, Rajpoot RK et al. Recombinant dengue virus 4 envelope glycoprotein virus-like particles derived from *Pichia pastoris* are capable of eliciting homotypic domain III-directed neutralizing antibodies. *Am J Trop Med Hyg* 2017;**96**:126–34.

- Khulape SA, Maity HK, Pathak DC *et al.* Antigenic validation of recombinant hemagglutinin-neuraminidase protein of Newcastle disease virus expressed in *Saccharomyces cerevisiae*. *Acta Virol* 2015;**59**:240–6.
- Kim HJ, Kim SY, Lim SJ *et al.* One-step chromatographic purification of human papillomavirus type 16 L1 protein from *Saccharomyces cerevisiae*. *Protein Expression Purif* 2010b;**70**:68–74.
- Kim HJ, Lee JY, Kang HA *et al.* Oral immunization with whole yeast producing viral capsid antigen provokes a stronger humoral immune response than purified viral capsid antigen. *Lett Appl Microbiol* 2014;**58**:285–91.
- Kim JM, Jung DI, Eom YJ *et al.* Surface-displayed expression of a neutralizing epitope of ApxIIA exotoxin in *Saccharomyces cerevisiae* and oral administration of it for protective immune responses against challenge by *Actinobacillus pleuropneumoniae*. *Biosci Biotechnol Biochem* 2010a;**74**:1362–7.
- Kim SN, Jeong HS, Park SN *et al.* Purification and immunogenicity study of human papillomavirus type 16 L1 protein in *Saccharomyces cerevisiae*. *J Virol Methods* 2007;**139**:24–30.
- King TH, Kemmler CB, Guo Z *et al.* A whole recombinant yeast-based therapeutic vaccine elicits HBV X, S and Core specific T cells in mice and activates human T cells recognizing epitopes linked to viral clearance. *PLoS One* 2014;**9**:e101904.
- King TH, Shanley CA, Guo Z *et al.* GI-19007, a novel *Saccharomyces cerevisiae*-based therapeutic vaccine against tuberculosis. *Clin Vaccine Immunol* 2017;**24**:e00245–17.
- Kingsman AJ, Burns NR, Layton GT *et al.* Yeast retrotransposon particles as antigen delivery systems. *Ann N Y Acad Sci* 1995;**754**:202–13.
- Klabunde J, Diesel A, Waschk D *et al.* Single-step co-integration of multiple expressible heterologous genes into the ribosomal DNA of the methylotrophic yeast *Hansenula polymorpha*. *Appl Microbiol Biotechnol* 2002;**58**:797–805.
- Kohama H, Umemura M, Okamoto Y *et al.* Mucosal immunization with recombinant heparin-binding haemagglutinin adhesion suppresses extra pulmonary dissemination of *Mycobacterium bovis* bacilli Calmette–Guerin (BCG) in infected mice. *Vaccine* 2008;**26**:924–32.
- Krebs KC, Tian M, Asmal M *et al.* Infection of Rhesus macaques with a pool of simian immunodeficiency virus with the envelope genes from acute HIV-1 infections. *AIDS Res Ther* 2016;**13**:41.
- Kumar R. Investigating the long-term stability of protein immunogen(s) for whole recombinant yeast-based vaccines. *FEMS Yeast Res* 2018;**18**:1–13.
- Kwang HL, Kim HJ, Chang DY *et al.* The production and immunogenicity of human papillomavirus type 58 virus-like particles produced in *Saccharomyces cerevisiae*. *J Microbiol* 2012;**50**:813–20.
- Lawson DH, Lee S, Zhao F *et al.* Randomized, placebo-controlled, phase III trial of yeast-derived granulocyte-macrophage colony-stimulating factor (GM-CSF) versus peptide vaccination versus GM-CSF plus peptide vaccination versus placebo in patients with no evidence of disease after complete surgical resection of locally advanced and/or Stage IV Melanoma: A Trial of the Eastern Cooperative Oncology Group-American college of radiology imaging network cancer research group (E4697). *J Clin Oncol* 2015;**33**:4066–76.
- Li HY, Han JF, Qin CF *et al.* Virus-like particles for enterovirus 71 produced from *Saccharomyces cerevisiae* potently elicits protective immune responses in mice. *Vaccine* 2013;**31**:3281–7.
- Li HZ, Gang HY, Sun QM *et al.* Production in *Pichia pastoris* and characterization of genetic engineered chimeric HBV/HEV virus-like particles. *Chin Med Sci J* 2004;**19**:78–83.
- Li Y, Song H, Li J *et al.* *Hansenula polymorpha* expressed heat shock protein gp96 exerts potent T cell activation activity as an adjuvant. *J Biotechnol* 2011;**151**:343–9.
- Lin GJ, Liu TY, Tseng YY *et al.* Yeast-expressed classical swine fever virus glycoprotein E2 induces a protective immune response. *Vet Microbiol* 2009;**139**:369–74.
- Lin T, Xianyu L, Lyu S. Monoclonal neutralizing antibodies against EV71 screened from mice immunized with yeast-produced virus-like particles. *Virologica Sin* 2015;**30**:208–13.
- Liu C, Yao Y, Yang X *et al.* Production of recombinant human papillomavirus type 52 L1 protein in *Hansenula polymorpha* formed virus-like particles. *J Microbiol Biotechnol* 2015;**25**:936–40.
- Liu M, Clemons KV, Bigos M *et al.* Immune responses induced by heat killed *Saccharomyces cerevisiae*: a vaccine against fungal infection. *Vaccine* 2011;**29**:1745–53.
- Liu R, Lin Q, Sun Y *et al.* Optimization of fermentation conditions for maximal recombinant hepatitis B surface antigen particle production in *Pichia pastoris*. *Sheng Wu Gong Cheng Xue Bao* 2008;**24**:2098–105.
- Liu W, Jiang H, Zhou J *et al.* Recombinant dengue virus-like particles from *Pichia pastoris*: efficient production and immunological properties. *Virus Genes* 2010;**40**:53–9.
- Liu Y, Zhou J, Yu Z *et al.* Tetravalent recombinant dengue virus-like particles as potential vaccine candidates: immunological properties. *BMC Microbiol* 2014;**14**:233.
- Lok AS, Pan CQ, Han SH *et al.* Randomized phase II study of GS-4774 as a therapeutic vaccine in virally suppressed patients with chronic hepatitis B. *J Hepatol* 2016;**65**:509–16.
- Lorent E, Bierau H, Engelborghs Y *et al.* Structural characterisation of the hepatitis C envelope glycoprotein E1 ectodomain derived from a mammalian and a yeast expression system. *Vaccine* 2008;**26**:399–410.
- Lowe RS, Brown DR, Bryan JT *et al.* Human papillomavirus type 11 (HPV-11) neutralizing antibodies in the serum and genital mucosal secretions of African green monkeys immunized with HPV-11 virus-like particles expressed in yeast. *J Infect Dis* 1997;**176**:1141–45.
- Lu Y, Bellgrau D, Dwyer-Nield LD *et al.* Mutation-selective tumour remission with Ras-targeted, whole yeast-based immunotherapy. *Cancer Res* 2004;**64**:5084–88.
- Lünsdorf H, Gurramkonda C, Adnan A *et al.* Virus-like particle production with yeast: ultrastructural and immunocytochemical insights into *Pichia pastoris* producing high levels of the hepatitis B surface antigen. *Microb Cell Fact* 2011;**10**:48.
- Luo G, Gebremariam T, Clemons KV *et al.* Heat-killed yeast protects diabetic ketoacidotic-steroid treated mice from pulmonary mucormycosis. *Vaccine* 2014;**32**:3573–76.
- Luu VT, Moon HY, Hwang JY *et al.* Development of recombinant *Yarrowia lipolytica* producing virus-like particles of a fish nervous necrosis virus. *J Microbiol* 2017;**55**:655–64.
- Malak A, Baronian K, Kunze G. *Blastobotrys (Arxula) adenivorans*: a promising alternative yeast for biotechnology and basic research. *Yeast* 2016;**33**:535–47.
- Mani S, Tripathi L, Raut R *et al.* *Pichia pastoris*-expressed dengue 2 envelope forms virus-like particles without pre-membrane protein and induces high titer neutralizing antibodies. *PLoS One* 2013;**8**:e64595.
- Marchenko AN, Kozlov DG, Svirshchevskaya EV *et al.* The p1 protein of the yeast transposon Ty1 can be used for the construction of bi-functional virus-like particles. *J Mol Microbiol Biotechnol* 2003;**5**:97–104.
- Mariz FC, Coimbra EC, Jesus AL *et al.* Development of an IP-free biotechnology platform for constitutive production of HPV16

- L1 capsid protein using the *Pichia pastoris* PGK1 promoter. *Biomed Res Int* 2015;2015:594120.
- Mazeika E, Gedvilaite A, Blohm U. Induction of insert-specific immune response in mice by hamster polyomavirus VP1 derived virus-like particles carrying LCMV GP33 CTL epitope. *Virus Res* 2012;163:2–10.
- Mendis K, Sina BJ, Marchesini P et al. The neglected burden of *Plasmodium vivax* malaria. *Am J Trop Med Hyg* 2001;64:97–106
- Mischo A, Bubel N, Cebon JS et al. Recombinant NY-ESO-1 protein with ISCOMATRIX adjuvant induces broad antibody responses in humans, a RAYS-based analysis. *Int J Oncol* 2011;39:287–94
- Mizukoshi F, Yamamoto T, Mitsuki YY et al. Activation of HIV-1 Gag-specific CD8+ T cells by yeast-derived VLP-pulsed dendritic cells is influenced by the level of mannose on the VLP antigen. *Microbes Infect* 2009;11:191–7.
- Mohsen MO, Zha L, Cabral-Miranda G et al. Major findings and recent advances in virus-like particle (VLP)-based vaccines. *Semin Immunol* 2017;34:123–32.
- Moon HY, Lee DW, Sim GH et al. A new set of rDNA-NTS-based multiple integrative cassettes for the development of antibiotic-marker-free recombinant yeasts. *J Biotechnol* 2016;233:190–99.
- Munson S, Parker J, King TH et al. Coupling innate and adaptive immunity with yeast-based cancer immunotherapy. In: Orentas R, Hodge JW, Johnson BD (eds). *Cancer Vaccines and Tumour Immunity*. , , (eds). Hoboken, NJ: John Wiley & Sons, 2008, 131–49.
- Narasimhan M, Ahmed PB, Venugopal V et al. Severe allergic eczematous skin reaction to 2009(H1N1) influenza vaccine injection. *Int J Dermatol* 2015;54:1340–1.
- Nguyen NL, Kim JM, Park JA et al. Expression and purification of an immunogenic dengue virus epitope using a synthetic consensus sequence of envelope domain III and *Saccharomyces cerevisiae*. *Protein Expression Purif* 2013;88:235–42.
- Noronha SB, Wagner LW, Matheson NH et al. Use of an ethanol sensor for feedback control of growth and expression of TBV25H in *Saccharomyces cerevisiae*. *Biotechnol Bioeng* 1999;63:285–9.
- Noss I, Ozment TR, Graves BM et al. Cellular and molecular mechanisms of fungal  $\beta$ -(1→6)-glucan in macrophages. *Innate Immun* 2015;21:759–69.
- O’Riordan AA, Morales VA, Mulligan L et al. Alkyl hydroperoxide reductase: A candidate *Helicobacter pylori* vaccine. *Vaccine* 2012;30:3876–84.
- Pan W, Huang DQ, Zhang QF et al. Fusion of two malaria vaccine candidate Ags enhances product yield, immunogenicity, and Ab-mediated inhibition of parasite growth in vitro. *J Immunol* 2004;172:6167–74.
- Pan Y, Li X, Kang T et al. Efficient delivery of antigen to DCs using yeast-derived microparticles. *Sci Rep* 2015;5:10687.
- Park MA, Kim HJ, Kim HJ. Optimum conditions for production and purification of human papillomavirus type 16 L1 protein from *Saccharomyces cerevisiae*. *Protein Expr Purif* 2008;59:175–81.
- Park SM, Mo AY, Lim JG et al. Surface displayed expression of a neutralizing epitope of spike protein from a Korean strain of porcine epidemic diarrhea virus. *Biotechnol Bioprocess Eng* 2007;12:690–95.
- Pastoret PP. Veterinary vaccinology. *Comptes Rendus De L Academie Des Sciences Serie III-Sciences De La Vie-Life Sciences* 1999;322:967–72.
- Patterson R, Eley T, Browne C et al. Oral application of freeze-dried yeast particles expressing the PCV2b cap protein on their surface induce protection to subsequent PCV2b challenge in vivo. *Vaccine* 2015;33:6199–205.
- Patterson R, Nerren J, Kogut M et al. Yeast-surface expressed BVDV E2 protein induces a Th1/Th2 response in naïve T cells. *Dev Comp Immunol* 2012;37:107–14.
- Peng M, Chen M, Ling N et al. Novel vaccines for the treatment of chronic HBV infection based on mycobacterial heat shock protein 70. *Vaccine* 2006;24:887–96.
- Penkert RR, Young NS, Surman SL et al. *Saccharomyces cerevisiae*-derived virus-like particle parvovirus B19 vaccine elicits binding and neutralizing antibodies in a mouse model for sickle cell disease. *Vaccine* 2017;35:3615–20.
- Perrie Y, Mohammed AR, Kirby DJ et al. Vaccine adjuvant systems: enhancing the efficacy of sub-unit protein antigens. *Int J Pharm* 2008;364:272–80.
- Pietrzak M, Maciola A, Zdanowski K et al. An avian influenza H5N1 virus vaccine candidate based on the extracellular domain produced in yeast system as subviral particles protects chickens from lethal challenge. *Antiviral Res* 2016;133:242–924.
- Pillemer L, Ecker EE. Anticomplementary factor in fresh yeast. *J Biol Chem* 1941;137:139–42.
- Pleckaityte M, Bremer CM, Gedvilaite A et al. Construction of polyomavirus-derived pseudotype virus-like particles displaying a functionally active neutralizing antibody against hepatitis B virus surface antigen. *BMC Biotechnol* 2015;15:85
- Plieskatt JL, Rezende WC, Olsen CM et al. Advances in vaccines against neglected tropical diseases: enhancing physical stability of a recombinant hookworm vaccine through biophysical and formulation studies. *Hum Vaccine Immunotherapeutics* 2012;8:765–76.
- Poddar A, Ramasamy V, Shukla R et al. Virus-like particles derived from *Pichia pastoris*-expressed dengue virus type 1 glycoprotein elicit homotypic virus-neutralizing envelope domain III-directed antibodies. *BMC Biotechnol* 2016;16:50.
- Potter KJ, Bevins MA, Vassilieva EV et al. Production and purification of the heavy-chain fragment C of botulinum neurotoxin, serotype B, expressed in the methylotrophic yeast *Pichia pastoris*. *Protein Expression Purif* 1998;13:357–65.
- Potter KJ, Zhang W, Smith LA et al. Production and purification of the heavy chain fragment C of botulinum neurotoxin, serotype A, expressed in the methylotrophic yeast *Pichia pastoris*. *Protein Expression Purif* 2000;19:393–402.
- Powilleit F, Breinig T, Schmitt MJ. Exploiting the yeast L-A viral capsid for the in vivo assembly of chimeric VLPs as platform in vaccine development and foreign protein expression. *PLoS One* 2007;2:415.
- Pumpens P, Razanskas R, Pushko P et al. Evaluation of HBs, HBC, and frCP virus-like particles for expression of human papillomavirus 16 E7 oncoprotein epitopes. *Intervirolgy* 2002;45:24–32.
- Purcell AW, McCluskey J, Rossjohn J. More than one reason to rethink the use of peptides in vaccine design. *Nat Rev Drug Discov* 2007;6:404–14.
- Radosevic K, Rodriguez A, Lemckert AA et al. The Th1 immune response to *Plasmodium falciparum* circumsporozoite protein is boosted by adenovirus vectors 35 and 26 with a homologous insert. *Clin Vaccine Immunol* 2010;17:1687–94.
- Rajpoot RK, Shukla R, Arora U et al. Dengue envelope-based ‘four-in-one’ virus-like particles produced using *Pichia pastoris* induce enhancement-lacking, domain III-directed tetravalent neutralising antibodies in mice. *Sci Rep* 2018;8:8643

- Ramasamy V, Arora U, Shukla R et al. A tetravalent virus-like particle vaccine designed to display domain III of dengue envelope proteins induces multi-serotype neutralizing antibodies in mice and macaques which confer protection against antibody dependent enhancement in AG129 mice. *PLoS Negl Trop Dis* 2018;12:e0006191.
- Remarque EJ, Faber BW, Kocken CH et al. A diversity-covering approach to immunization with *Plasmodium falciparum* apical membrane antigen 1 induces broader allelic recognition and growth inhibition responses in rabbits. *Infect Immun* 2008;76:2660–70.
- Remondo C, Cereda V, Mostbock S et al. Human dendritic cell maturation and activation by a heat-killed recombinant yeast (*Saccharomyces cerevisiae*) vector encoding carcinoembryonic antigen. *Vaccine* 2009;27:987–94.
- Riemann H, Takao J, Shellman YG et al. Generation of a prophylactic melanoma vaccine using whole recombinant yeast expressing MART-1. *Exp Dermatol* 2007;16:814–22.
- Robert W H, Kelly R, McNeely TB et al. A recombinant 63-kDa form of *Bacillus anthracis* protective antigen produced in the yeast *Saccharomyces cerevisiae* provides protection in rabbit and primate inhalational challenge models of anthrax infection. *Vaccine* 2006;24:1501–14.
- Rocha MV, Franoso KS, Lima LC et al. Generation, characterization and immunogenicity of a novel chimeric recombinant protein based on *Plasmodium vivax* AMA-1 and MSP1<sub>19</sub>. *Vaccine* 2017;35:2463–72.
- Rodr guez-Limas WA, Tyo KE, Nielsen J et al. Molecular and process design for rotavirus-like particle production in *Saccharomyces cerevisiae*. *Microb Cell Fact* 2011;10:33
- Rold o A, Mellado MC, Castilho LR et al. Virus-like particles in vaccine development. *Expert Rev Vaccines* 2010;9:1149–76.
- Romanos MA, Clare JJ, Beesley KM et al. Recombinant *Bordetella pertussis* pertactin (P69) from the yeast *Pichia pastoris*: high-level production and immunological properties. *Vaccine* 1991;9:901–06.
- Romanos MA, Scorer CA, Clare JJ. Foreign gene-expression in yeast a review. *Yeast* 1992;8:423–88.
- Rose AH, Harrison JS. *The Yeasts*. 2nd ed. London/San Diego: Academic Press, 1987.
- Rubin LG, Levin MJ, Ljungman P et al. 2013 IDSA Clinical Practice Guideline for Vaccination of the Immunocompromised Host. *Clin Infect Dis* 2014;58:309–18.
- Saegusa S, Totsuka M, Kaminogawa S et al. *Saccharomyces cerevisiae* and *Candida albicans* stimulate cytokine secretion from human neutrophil-like HL-60 cells differentiated with retinoic acid or dimethylsulfoxide. *Biosci Biotechnol Biochem* 2009;73:2600–8.
- Sakuragi S, Goto T, Sano K et al. HIV type 1 Gag virus-like particle budding from spheroplasts of *Saccharomyces cerevisiae*. *Proc Natl Acad Sci U S A* 2002;99:7956–61.
- Kumar S, Collins W, Egan A et al. Immunogenicity and efficacy in aotus monkeys of four recombinant *Plasmodium falciparum* vaccines in multiple adjuvant formulations based on the 19-kilodalton C terminus of merozoite surface protein 1. *Infect Immun* 2000;68:2215–23.
- Sasnauskas K, Bulavaite A, Hale A et al. Generation of recombinant virus-like particles of human and non-human polyomaviruses in yeast *Saccharomyces cerevisiae*. *Intervirology* 2002;45:308–17.
- Sattabongkot J, Tsuboi T, Hisaeda H et al. Blocking of transmission to mosquitoes by antibody to *Plasmodium vivax* malaria vaccine candidates Pvs25 and Pvs28 despite antigenic polymorphism in field isolates. *American Journal of Tropical Medicine and Hygiene* 2003;69:536–41.
- Sauerwein H, Schmitz S, Hiss S. Effects of a dietary application of a yeast cell wall extract on innate and acquired immunity, on oxidative status and growth performance in weanling piglets and on the ileal epithelium in fattened pigs. *J Anim Physiol Anim Nutr (Berl)* 2007;91:369–80.
- Schreuder MP, Brekelmans S, van den Ende H et al. Targeting of a heterologous protein to the cell wall of *Saccharomyces cerevisiae*. *Yeast* 1993;9:399–409.
- Schreuder MP, Deen C, Boersma WJ et al. Yeast expressing hepatitis B virus surface antigen determinants on its surface: implications for a possible oral vaccine. *Vaccine* 1996;14:383–8.
- Scollard DM, Adams LB, Gillis TP et al. The continuing challenges of leprosy. *Clin Microbiol Rev* 2006;9:338–81.
- Scorer CA, Buckholz RG, Clare JJ et al. The intracellular production and secretion of HIV-1 envelope protein in the methylotrophic yeast *Pichia pastoris*. *Gene* 1993;136:111–9.
- Seif M, Philippi A, Breinig F et al. Yeast (*Saccharomyces cerevisiae*) polarizes both M-CSF- and GM-CSF-Differentiated macrophages toward an M1-Like phenotype. *Inflammation* 2016;39:1690–1703
- Seo JY, Chung HJ, Kim TJ. Codon-optimized expression of fish iridovirus capsid protein in yeast and its application as an oral vaccine candidate. *J Fish Dis* 2013;36:763–8.
- Shams H. Recent developments in veterinary vaccinology. *Vet J* 2005;170:289–99.
- Shibasaki S, Ueda M. Oral vaccine development by molecular display methods using microbial cells. *Methods Mol Biol* 2016;1404:497–509.
- Shin MK, Kang ML, Jung MH et al. Induction of protective immune responses against challenge of *Actinobacillus pleuropneumoniae* by oral administration with *Saccharomyces cerevisiae* expressing Apx toxins in pigs. *Vet Immunol Immunopathol* 2013;151:132–39.
- Shin M-K, Yoo HS. Animal vaccines based on orally presented yeast recombinants. *Vaccine* 2013;31:4287–92.
- Shin SJ, Bae JL, Cho YW et al. Induction of antigen-specific immune responses by oral vaccination with *Saccharomyces cerevisiae* expressing *Actinobacillus pleuropneumoniae* ApxIIA. *FEMS Immunol Med Microbiol* 2005;43:155–64.
- Shin SJ, Shin SW, Kang ML et al. Enhancement of protective immune responses by oral vaccination with *Saccharomyces cerevisiae* expressing recombinant *Actinobacillus pleuropneumoniae* ApxIA or ApxIIA in mice. *J Vet Sci* 2007;8:383–92.
- Shin SJ, Bae JL, Cho YW et al. Expression of apxIA of *Actinobacillus pleuropneumoniae* in *Saccharomyces cerevisiae*. *J Vet Sci* 2003;3:225–28.
- Soares IS, Rodrigues MM. Immunogenic properties of the *Plasmodium vivax* vaccine candidate MSP1(19) expressed as a secreted non-glycosylated polypeptide from *Pichia pastoris*. *Parasitology* 2002;124:237–46.
- Song H, Zhou L, Fang W et al. High-level expression of codon optimized foot-and-mouth disease virus complex epitopes and cholera toxin B subunit chimera in *Hansenula polymorpha*. *Biochem Biophys Res Commun* 2004;315:235–9.
- Stevens DA, Clemons KV, Liu M. Developing a vaccine against aspergillosis. *Med Mycol* 2011;49:170–6
- Stowers AW, Cioce V, Shimp RL et al. Efficacy of two alternate vaccines based on *Plasmodium falciparum* merozoite surface protein 1 in an Aotus challenge trial. *Infect Immun* 2001a;69:1536–46.

- Stowers AW, Keister DB, Muratova O et al. A region of *Plasmodium falciparum* antigen Pfs25 that is the target of highly potent transmission-blocking antibodies. *Infect Immun* 2000;**68**:5530–8.
- Stowers AW, Zhang Y, Shimp RL et al. Structural conformers produced during malaria vaccine production in yeast. *Yeast* 2001b;**18**:137–50.
- Strathern JN, Jones EW, Broach JR. *The Molecular Biology of the Yeast Saccharomyces: Metabolism and Gene Expression*. Cold Spring Harbor, N.Y.: Cold Spring Harbor Laboratory, 1982.
- Stubbs AC, Martin KS, Coeshott C et al. Whole recombinant yeast vaccine activates dendritic cells and elicits protective cell-mediated immunity. *Nat Med* 2001;**7**:625–9.
- Sun T, Han H, Hudalla GA et al. Thermal stability of self-assembled peptide vaccine materials. *Acta Biomater* 2016;**30**:62–71.
- Tada H, Nemoto E, Shimauchi H et al. *Saccharomyces cerevisiae* and *Candida albicans*-derived mannan induced production of tumour necrosis factor alpha by human monocytes in a CD14- and toll-like receptor 4-dependent manner. *Microbiol Immunol* 2002;**46**:503–12.
- Tan KL, Goh KT, Oon CJ et al. Immunogenicity of recombinant yeast-derived hepatitis B vaccine in nonresponders to perinatal immunization. *JAMA* 1994;**271**:859–61.
- Tanaka A, Jensen JD, Prado R et al. Whole recombinant yeast vaccine induces antitumour immunity and improves survival in a genetically engineered mouse model of melanoma. *Gene Ther* 2011;**18**:827–34.
- Tang YX, Jiang LF, Zhou JM et al. Induction of virus-neutralizing antibodies and T cell responses by dengue virus type 1 virus-like particles prepared from *Pichia pastoris*. *Chin Med J (Engl)* 2012;**125**:1986–92.
- Tomo N, Goto T, Morikawa Y. Trans-packaging of human immunodeficiency virus type 1 genome into Gag virus-like particles in *Saccharomyces cerevisiae*. *Microb Cell Fact* 2013;**12**:28.
- Tu Y, Wang Y, Wang G et al. High-level expression and immunogenicity of a porcine circovirus type 2 capsid protein through codon optimization in *Pichia pastoris*. *Appl Microbiol Biotechnol* 2013;**97**:2867–75.
- Ueda M, Tanaka A. Genetic immobilization of proteins on the yeast cell surface. *Biotechnol Adv* 2000;**18**:121–40.
- Underhill DM, Gantner B. Integration of Toll-like receptor and phagocytic signaling for tailored immunity. *Microbes Infect* 2003;**6**:1368–73.
- Upadhyaya B, Manjunath R. Baker's yeast expressing the Japanese encephalitis virus envelope protein on its cell surface: induction of an antigen-specific but non-neutralizing antibody response. *Yeast* 2009;**26**:383–97.
- Vetvicka V. Glucan-immunostimulant, adjuvant, potential drug. *World J Clin Oncol* 2011;**2**:115–19.
- Valenzuela P, Medina A, Rutter WJ et al. Synthesis and assembly of hepatitis B virus surface antigen particles in yeast. *Nature* 1982;**298**:347–50.
- van den Berg JA, van der Laken KJ, van Ooyen AJ et al. *Kluyveromyces* as a host for heterologous gene expression: expression and secretion of prochymosin. *Bio/Technology* 1990;**8**:135–9.
- van Ooyen AJ, Dekker P, Huang M et al. Heterologous protein production in the yeast *Kluyveromyces lactis*. *FEMS Yeast Res* 2006;**6**:381–92.
- Vanloubbeeck Y, Pichyangkul S, Bayat B et al. Comparison of the immune responses induced by soluble and particulate *Plasmodium vivax* circumsporozoite vaccine candidates formulated in AS01 in rhesus macaques. *Vaccine* 2013;**31**:6216–24.
- Vicentin EC, Franoso KS, Rocha MV et al. Invasion-inhibitory antibodies elicited by immunization with *Plasmodium vivax* apical membrane antigen-1 expressed in *Pichia pastoris* yeast. *Infect Immun* 2014;**82**:1296–307.
- Villegas P, Hamoud M, Purvis LB et al. Infectious bursal disease subunit vaccination. *Avian Dis* 2008;**52**:670–4.
- Wadle A, Mischo A, Strahl S et al. NY-ESO-1 protein glycosylated by yeast induces enhanced immune responses. *Yeast* 2010;**27**:919–31.
- Walachowski S, Tabouret G, Foucras G. Triggering dectin-1-pathway alone is not sufficient to induce cytokine production by murine macrophages. *PLoS One* 2016;**11**:e0148464.
- Walch B, Breinig T, Geginat G et al. Yeast-based protein delivery to mammalian phagocytic cells is increased by coexpression of bacterial listeriolysin. *Microbes Infect* 2011;**13**:908–13.
- Walker GM. *Yeast Physiology and Biotechnology*. Chichester, New York: J.Wiley & Sons, 1998.
- Wang C, Li XK, Wu TC et al. Recombinant VP1 protein of duck hepatitis virus 1 expressed in *Pichia pastoris* and its immunogenicity in ducks. *Acta Virol* 2014;**58**:333–39.
- Wang CY, Luo YL, Chen YT et al. The cleavage of the hemagglutinin protein of H5N2 avian influenza virus in yeast. *J Virol Methods* 2007;**146**:293–7.
- Wang H, Chen X, Wang D et al. Epitope-focused immunogens against the CD4-binding site of HIV-1 envelope protein induce neutralizing antibodies against auto- and heterologous viruses. *J Biol Chem* 2018a;**293**:830–46.
- Wang J, Stenzel D, Liu A et al. Quantification of a recombinant antigen in an immuno-stimulatory whole yeast cell-based therapeutic vaccine. *Anal Biochem* 2018d;**545**:65–71.
- Wang LJ, Xiao T, Xu C et al. Protective immune response against *Toxoplasma gondii* elicited by a novel yeast-based vaccine with microneme protein 16. *Vaccine* 2018c;**36**:3943–48.
- Wang M, Pan Q, Lu Z et al. An optimized, highly efficient, self-assembled, subvirus-like particle of infectious bursal disease virus (IBDV). *Vaccine* 2016b;**34**:3508–14.
- Wang SC, Liao HY, Zhang JY et al. Development of a universal influenza vaccine using hemagglutinin stem protein produced from *Pichia pastoris*. *Virology* 2018b;**526**:125–37.
- Wang X, Xiao X, Zhao M et al. EV71 virus-like particles produced by co-expression of capsid proteins in yeast cells elicit humoral protective response against EV71 lethal challenge. *BMC Res Notes* 2016a;**9**:42.
- Wansley EK, Chakraborty M, Hance KW et al. Vaccination with a recombinant *Saccharomyces cerevisiae* expressing a tumour antigen breaks immune tolerance and elicits therapeutic antitumour responses. *Clin Cancer Res* 2008;**14**:4316–25.
- Wasilenko JL, Sarmiento L, Spatz S et al. Cell surface display of highly pathogenic avian influenza virus hemagglutinin on the surface of *Pichia pastoris* cells using alpha-agglutinin for production of oral vaccines. *Biotechnol Prog* 2010;**26**:542–7.
- Wei J, Versteeg L, Liu Z et al. Yeast-expressed recombinant As16 protects mice against *Ascaris suum* infection through induction of a Th2-skewed immune response. *PLoS Negl Trop Dis* 2017;**11**:e0005769.
- Welsh MD, Harper DR, Garcia-Valcarcel M et al. Ability of yeast Ty-VLPs (virus-like particles) containing varicella-zoster virus (VZV) gE and assembly protein fragments to induce in vitro proliferation of human lymphocytes from VZV immune patients. *J Med Virol* 1999;**59**:78–83.

- Wery J, Gutker D, Renniers AC et al. High copy number integration into the ribosomal DNA of the yeast *Phaffia rhodozyma*. *Gene* 1997;184:89–97.
- Wetzel D, Rolf T, Suckow M et al. Establishment of a yeast-based VLP platform for antigen presentation. *Microb Cell Fact* 2018;17:17.
- Wi GR, Hwang JY, Kwon MG et al. Protective immunity against nervous necrosis virus in convict grouper *Epinephelus septemfasciatus* following vaccination with virus-like particles produced in yeast *Saccharomyces cerevisiae*. *Vet Microbiol* 2015;177:214–8.
- Woo MK, An JM, Kim JD et al. Expression and purification of human papillomavirus 18 L1 virus-like particle from *Saccharomyces cerevisiae*. *Arch Pharm Res* 2008;31:205–9.
- Woo MK, Hur SJ, Park S et al. Study of cell-mediated response in mice by HPV16 L1 virus-like particles expressed in *Saccharomyces cerevisiae*. *J Microbiol Biotechnol* 2007;17:1738–41.
- Xiao Y, Zhao P, Du J et al. High-level expression and immunogenicity of porcine circovirus type 2b capsid protein without nuclear localization signal expressed in *Hansenula polymorpha*. *Biologicals* 2018;51:18–24.
- Yadava A, Ockenhouse CF. Effect of codon optimization on expression levels of a functionally folded malaria vaccine candidate in prokaryotic and eukaryotic expression systems. *Infect Immun* 2003;71:4961–69.
- Yang Z, Marshall JS. Zymosan treatment of mouse mast cells enhances dectin-1 expression and induces dectin-1-dependent reactive oxygen species (ROS) generation. *Immunobiology* 2009;214:321–30.
- Yongkiettrakul S, Boonyapakron K, Jongkaewwattana A et al. Avian influenza A/H5N1 neuraminidase expressed in yeast with a functional head domain. *J Virol Methods* 2009;156:44–51.
- Yoon TJ, Kim TJ, Lee H et al. Anti-tumour metastatic activity of beta-glucan purified from mutated *Saccharomyces cerevisiae*. *Int Immunopharmacol* 2008;8:36–42.
- Yu X, Zhang D, Shi B et al. Oral administered particulate yeast-derived glucan promotes hepatitis B virus clearance in a hydrodynamic injection mouse model. *PLoS One* 2015;10:e0123559.
- Zahid M, Lünsdorf H, Rinas U. Assessing stability and assembly of the hepatitis B surface antigen into virus-like particles during down-stream processing. *Vaccine* 2015;33:3739–45.
- Zeng Y, Cai DC, Peng ML et al. The primary study on the anti-HBV effect of whole recombinant yeast. *Zhonghua Gan Zang Bing Za Zhi* 2003;11:728–30.
- Zhan B, Perally S, Brophy PM et al. Molecular cloning, biochemical characterization, and partial protective immunity of the heme-binding glutathione S-transferases from the human hookworm *Necator americanus*. *Infect Immun* 2010;78:1552–63.
- Zhang C, Ku Z, Liu Q et al. High-yield production of recombinant virus-like particles of enterovirus 71 in *Pichia pastoris* and their protective efficacy against oral viral challenge in mice. *Vaccine* 2015;33:2335–41.
- Zhang C, Liu Q, Ku Z et al. Coxsackievirus A16-like particles produced in *Pichia pastoris* elicit high-titer neutralizing antibodies and confer protection against lethal viral challenge in mice. *Antiviral Res* 2016;129:47–51.
- Zhang C, Zhang X, Zhang W et al. Enterovirus D68 virus-like particles expressed in *Pichia pastoris* potently induce neutralizing antibody responses and confer protection against lethal viral infection in mice. *Emerg Microbes Infect* 2018;7:3.
- Zhang D, Pan W, Lu D et al. Synthesis and expression of 42 kD C-terminal region of the major merozoite surface protein (MSP1 - 42) of *P. falciparum* 3D7 strain in *Pichia pastoris*. *Zhonghua Yi Xue Za Zhi* 2002;82:198–202.
- Zhang L, Liu J, Lu J et al. Antibody response to revaccination among adult non-responders to primary Hepatitis B vaccination in China. *Hum Vaccin Immunother* 2015a;11:2716–22.
- Zhang T, Sun L, Xin Y et al. A vaccine grade of yeast *Saccharomyces cerevisiae* expressing mammalian myostatin. *BMC Biotechnol* 2012;12:97.
- Zhang X, Xin L, Li S et al. Lessons learned from successful human vaccines: delineating key epitopes by dissecting the capsid proteins. *Hum Vaccine Immunotherapeutics* 2015b;11:1277–92.
- Zhang ZG, Yu WG, Qiu WS et al. Immunogenicity of C-terminus of *Plasmodium falciparum* merozoite surface protein 1 expressed as a non-glycosylated polypeptide in yeast. *Acta Biochim Biophys Sin (Shanghai)* 2006;38:403–9.
- Zhao H, Li HY, Han JF et al. Virus-like particles produced in *Saccharomyces cerevisiae* elicit protective immunity against Coxsackievirus A16 in mice. *Appl Microbiol Biotechnol* 2013;97:10445–52.
- Zhao H, Li HY, Han JF et al. Novel recombinant chimeric virus-like particle is immunogenic and protective against both enterovirus 71 and coxsackievirus A16 in mice. *Sci Rep* 2015;5:7878.
- Zhou Y, Fan Y, LaPatra SE et al. Protective immunity of a *Pichia pastoris* expressed recombinant iridovirus major capsid protein in the Chinese giant salamander, *Andrias davidianus*. *Vaccine* 2015;33:5662–9.
- Zhou Y, Shen C, Zhang C et al. Yeast-produced recombinant virus-like particles of coxsackievirus A6 elicited protective antibodies in mice. *Antiviral Res* 2016;132:165–9.
- Zhu X, Wu S, Letchworth GJ. 3. Yeast-secreted bovine herpesvirus type 1 glycoprotein D has authentic conformational structure and immunogenicity. *Vaccine* 1997;15:679–88.
- Zhu X, Wu S, Letchworth GJ. A chimeric protein comprised of bovine herpesvirus type 1 glycoprotein D and bovine interleukin-6 is secreted by yeast and possesses biological activities of both molecules. *Vaccine* 1999;17:269–82.
- Zielonka A, Gedvilaite A, Reetz J et al. Serological cross-reactions between four polyomaviruses of birds using virus-like particles expressed in yeast. *J Gen Virol* 2012;93:2658–67.
- Zielonka A, Gedvilaite A, Ulrich R et al. Generation of virus-like particles consisting of the major capsid protein VP1 of goose hemorrhagic polyomavirus and their application in serological tests. *Virus Res* 2006;120:128–37.
